# Supplementary material for: Computational insight into hydrogen persulfide and a new additive model for chemical and biological simulations
Source: Royal Society of Chemistry journal article supplement (doi:10.1039/c9cp02998b), 2019-01-01
Supplement: c9cp02998b1.pdf [file c9cp02998b1.pdf]

Supporting Information for:

# Computational insight into hydrogen persulfide and a new additive model for chemical and biological simulations

*Esam A. Orabi\*<sup>†</sup> and Gilles H. Peslherbe\**

Centre for Research in Molecular Modeling  
and Department of Chemistry and Biochemistry, Concordia University,  
7141 Sherbrooke Street West, Montréal, Québec H4B 1R6, Canada

<sup>†</sup> On leave from the Department of Chemistry, Faculty of Science, Assiut University, Assiut 71516, Egypt

\* Corresponding author. E-mail: [Orabiesam@gmail.com](mailto:Orabiesam@gmail.com)  
Tel.: +1-438-930-8809; Fax: +1-204-474-7608

\* Corresponding author. E-mail: [Gilles.Peslherbe@concordia.ca](mailto:Gilles.Peslherbe@concordia.ca)  
Tel.: +1-514-848-2424, ext. 3338. Fax: +1-514-848-2868

## Table of Contents

|                                                                                                                                                                                                                                                                                                      |     |
|------------------------------------------------------------------------------------------------------------------------------------------------------------------------------------------------------------------------------------------------------------------------------------------------------|-----|
| Molecular properties of H <sub>2</sub> S <sub>2</sub> and H <sub>2</sub> S calculated with MP2(full)/6-311++G(d,p), CCSD(T)/6-311++G(3df,3pd) and CCSD(T)/aug-cc-pVXZ (X = D, T, Q) (Table S1).....                                                                                                  | S3  |
| Resonance in the perthiyl radical (Figure S1).....                                                                                                                                                                                                                                                   | S4  |
| Binding energies for the H <sub>2</sub> S <sub>2</sub> complexes presented in Figures 2–5 of the main text calculated with MP2(full)/6-311++G(d,p) and CCSD(T)/6-311++G(3df,3pd) as well as with CCSD(T)/aug-cc-pV5Z for the (H <sub>2</sub> S <sub>2</sub> ) <sub>2</sub> dimer (Tables S2–S5)..... | S5  |
| Density of liquid H <sub>2</sub> S <sub>2</sub> calculated with the optimized additive model vs <i>T</i> and <i>p</i> (Table S6).....                                                                                                                                                                | S9  |
| Calculated density of liquid H <sub>2</sub> S <sub>2</sub> vs temperature (Figure S2).....                                                                                                                                                                                                           | S9  |
| Atomic coordinates of the structures presented in Figure 1–5 of the main text.....                                                                                                                                                                                                                   | S10 |
| FF for H <sub>2</sub> S <sub>2</sub> and parameters for its interactions with amino acid side chains.....                                                                                                                                                                                            | S55 |

**Table S1.** Molecular properties of H<sub>2</sub>S<sub>2</sub> and H<sub>2</sub>S.

| Molecule<br>(conformer)                          | Property                                    | MP2(full)/<br>6-311++G(d,p) | CCSD(T)/<br>6-311++G(3df,3pd) | CCSD(T)/aug-cc-pVXZ |       |       |  |
|--------------------------------------------------|---------------------------------------------|-----------------------------|-------------------------------|---------------------|-------|-------|--|
|                                                  |                                             |                             |                               | X=D                 | X=T   | X=Q   |  |
| <b>H<sub>2</sub>S<sub>2</sub></b><br><b>(pa)</b> | $r_{SH}$ (Å)                                | 1.336                       | 1.342                         | 1.359               | 1.346 | 1.343 |  |
|                                                  | $r_{SS}$ (Å)                                | 2.082                       | 2.070                         | 2.121               | 2.084 | 2.067 |  |
|                                                  | $r_{S...H}$ (Å)                             | 2.627                       | 2.620                         | 2.658               | 2.627 | 2.619 |  |
|                                                  | $r_{H...H}$ (Å)                             | 3.097                       | 3.091                         | 3.123               | 3.093 | 3.092 |  |
|                                                  | $\theta_{HSS}$ (deg)                        | 98.0                        | 98.1                          | 97.1                | 97.7  | 98.1  |  |
|                                                  | $\phi_{HSSH}$ (deg)                         | 91.0                        | 90.5                          | 91.1                | 90.7  | 90.7  |  |
|                                                  | Dipole (D)                                  | 1.53                        | 1.22                          | 1.29                | 1.25  | 1.24  |  |
|                                                  | $\alpha$ (Å <sup>3</sup> )                  | 5.26                        | 6.33                          | 6.53                | 6.58  | 6.56  |  |
|                                                  | IPV (eV)                                    | 9.93                        | 10.01                         | 9.90                | 10.07 | 10.13 |  |
|                                                  | S–S BDE (kcal/mol)                          | 51.2                        | 58.0                          | 51.2                | 58.3  | 61.2  |  |
|                                                  | S–H BDE(kcal/mol)                           | 69.4                        | 71.7                          | 69.4                | 71.9  | 72.4  |  |
|                                                  | Vibrational frequencies (cm <sup>-1</sup> ) |                             |                               |                     |       |       |  |
|                                                  | $\nu_1$ (sym. SH str.)                      | 2783                        | 2683                          | 2656                | 2668  | 2671  |  |
|                                                  | $\nu_2$ (sym. HSS-bend.)                    | 923                         | 902                           | 879                 | 894   | 901   |  |
|                                                  | $\nu_3$ (SS-stretch)                        | 516                         | 516                           | 488                 | 512   | 523   |  |
|                                                  | $\nu_4$ (SS-torsion)                        | 412                         | 435                           | 417                 | 424   | 433   |  |
|                                                  | $\nu_5$ (antisym. SH-str.)                  | 2785                        | 2686                          | 2658                | 2670  | 2676  |  |
| $\nu_6$ (antisym. HSS-bend.)                     | 916                                         | 901                         | 873                           | 892                 | 899   |       |  |
| <b>H<sub>2</sub>S<sub>2</sub></b><br><b>(pb)</b> | $r_{SH}$ (Å)                                | 1.333                       | 1.337                         | 1.356               | 1.342 | 1.339 |  |
|                                                  | $r_{SS}$ (Å)                                | 2.136                       | 2.128                         | 2.176               | 2.139 | 2.123 |  |
|                                                  | $r_{S...H}$ (Å)                             | 2.641                       | 2.633                         | 2.680               | 2.640 | 2.628 |  |
|                                                  | $r_{H...H}$ (Å)                             | 2.433                       | 2.418                         | 2.456               | 2.415 | 2.409 |  |
|                                                  | $\theta_{HSS}$ (deg)                        | 96.4                        | 96.2                          | 95.9                | 95.9  | 96.1  |  |
|                                                  | $\Phi_{HSSH}$ (deg)                         | 0.0                         | 0.0                           | 0.0                 | 0.0   | 0.0   |  |
|                                                  | Dipole (D)                                  | 2.14                        | 1.67                          | 1.77                | 1.71  | 1.70  |  |
|                                                  | $\alpha$ (Å <sup>3</sup> )                  | 5.29                        | 6.39                          | 6.59                | 6.65  | 6.64  |  |
|                                                  | IPV (eV)                                    | 8.61                        | 8.85                          | 8.78                | 8.92  | 8.96  |  |
|                                                  | $\Delta E$ (kcal/mol) <sup>a</sup>          | 7.2                         | 7.2                           | 6.8                 | 6.9   | 7.1   |  |
|                                                  | S–S BDE (kcal/mol)                          | 44.0                        | 50.8                          | 44.4                | 51.4  | 54.1  |  |
| S–H BDE (kcal/mol)                               | 62.2                                        | 64.5                        | 62.6                          | 65.0                | 65.3  |       |  |
| <b>H<sub>2</sub>S<sub>2</sub></b><br><b>(pc)</b> | $r_{SH}$ (Å)                                | 1.333                       | 1.338                         | 1.356               | 1.343 | 1.340 |  |
|                                                  | $r_{SS}$ (Å)                                | 2.126                       | 2.116                         | 2.164               | 2.127 | 2.112 |  |
|                                                  | $r_{S...H}$ (Å)                             | 2.563                       | 2.559                         | 2.606               | 2.568 | 2.556 |  |
|                                                  | $r_{H...H}$ (Å)                             | 3.490                       | 3.494                         | 3.547               | 3.504 | 3.493 |  |
|                                                  | $\theta_{HSS}$ (deg)                        | 92.8                        | 92.8                          | 92.6                | 92.7  | 92.8  |  |
|                                                  | $\Phi_{HSSH}$ (deg)                         | 180.0                       | 180.0                         | 180.0               | 180.0 | 180.0 |  |
|                                                  | Dipole (D)                                  | 0.0                         | 0.0                           | 0.0                 | 0.0   | 0.0   |  |
|                                                  | $\alpha$ (Å <sup>3</sup> )                  | 5.35                        | 6.40                          | 6.61                | 6.67  | 6.65  |  |
|                                                  | IPV (eV)                                    | 8.56                        | 8.81                          | 8.74                | 8.88  | 8.92  |  |
|                                                  | $\Delta E$ (kcal/mol) <sup>a</sup>          | 4.7                         | 5.1                           | 4.8                 | 4.8   | 5.0   |  |
|                                                  | S–S BDE (kcal/mol)                          | 46.6                        | 52.9                          | 46.4                | 53.4  | 56.1  |  |
| S–H BDE (kcal/mol)                               | 64.7                                        | 66.6                        | 64.6                          | 67.1                | 67.3  |       |  |
| <b>H<sub>2</sub>S</b>                            | $r_{SH}$ (Å)                                | 1.333                       | 1.338                         | 1.356               | 1.342 | 1.340 |  |
|                                                  | $\theta_{HSS}$ (deg)                        | 92.1                        | 92.5                          | 92.4                | 92.3  | 92.3  |  |
|                                                  | Dipole (D)                                  | 1.37                        | 1.06                          | 1.14                | 1.09  | 1.08  |  |
|                                                  | $\alpha$ (Å <sup>3</sup> )                  | 2.65                        | 3.41                          | 3.50                | 3.60  | 3.62  |  |
|                                                  | IPV (eV)                                    | 9.99                        | 10.32                         | 10.18               | 10.39 | 10.45 |  |
|                                                  | S–H BDE (kcal/mol)                          | 83.3                        | 88.6                          | 84.4                | 88.3  | 89.5  |  |

<sup>a</sup> Relative energy ( $\Delta E = E_{pb/pc} - E_{pa}$ ) corrected for ZPE

Note: Properties calculated with MP2(full)/6-311++G(d,p) and CCSD(T)/aug-cc-pVDZ show the least agreement with the experimental properties reported in Table 1 of the main text.

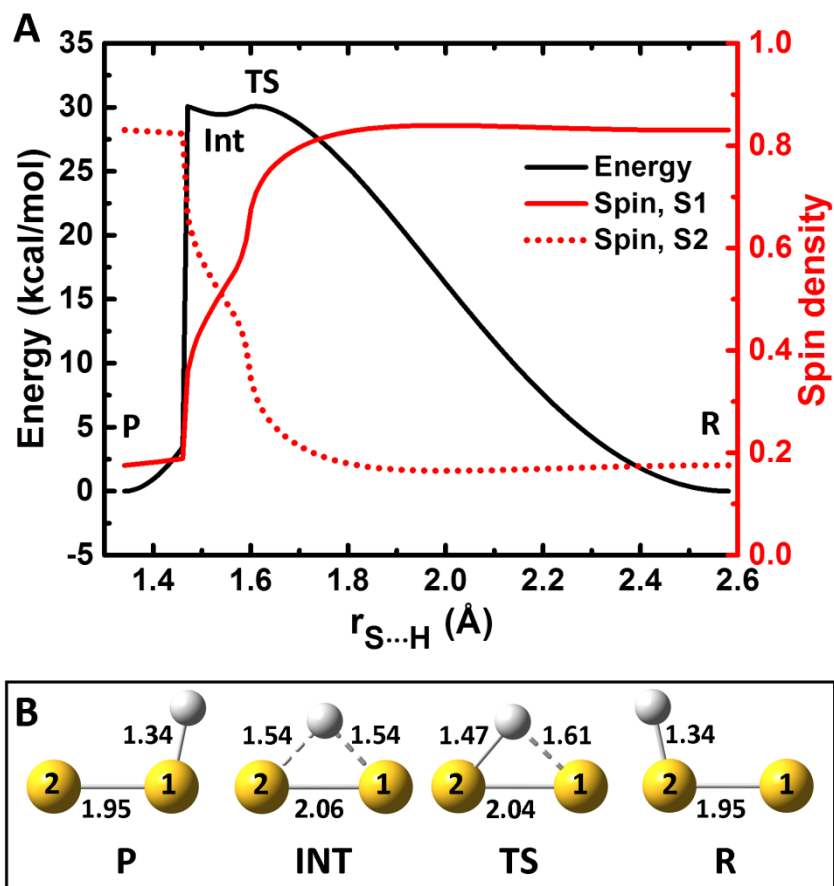

**Figure S1.** Resonance in the perthiyl radical ( $HSS^* \leftrightarrow ^*SSH$ ). (A) Relaxed scan of the distance between S1 and H from 2.58 to 1.34 Å, in 0.01 Å increments. The black curve (scale on the left) show the change in energy and red curves (scale on the right) show the radical density on each S atom along the scan. (B) Geometry and structural properties of the reactant (R), product (P), transition state (TS), and intermediate (Int) observed during the scan.

**Table S2.** Binding energies ( $E$  and  $E^{\text{CP}}$ , kcal/mol) for the  $(\text{H}_2\text{S}_2)_2$  and  $(\text{H}_2\text{S}_2)_3$  complexes displayed in Figure 2 of the main text.<sup>a</sup>

| Complex                    | Conformer  | MP2(full)/6-311++G(d,p) |                 | CCSD(T)/6-311++G(3df,3pd) |                 | CCSD(T)/aug-cc-pV5Z <sup>b</sup> |                 |
|----------------------------|------------|-------------------------|-----------------|---------------------------|-----------------|----------------------------------|-----------------|
|                            |            | $E$                     | $E^{\text{CP}}$ | $E$                       | $E^{\text{CP}}$ | $E$                              | $E^{\text{CP}}$ |
| $(\text{H}_2\text{S}_2)_2$ | <b>2pa</b> | -3.6                    | 0.0             | -3.4                      | -1.7            | -2.9                             | -2.8            |
|                            | <b>2pb</b> | -3.9                    | -1.1            | -4.2                      | -2.6            | -3.5                             | -3.3            |
|                            | <b>2pc</b> | -4.0                    | -0.3            | -4.2                      | -2.4            | -3.8                             | -3.6            |
|                            | <b>2pd</b> | -5.0                    | -1.2            | -4.5                      | -2.7            | -3.9                             | -3.7            |
|                            | <b>2pe</b> | -4.4                    | -0.5            | -4.7                      | -2.9            | -4.4                             | -4.2            |
|                            | <b>2pf</b> | -4.4                    | -0.3            | -5.2                      | -3.2            | -4.9                             | -4.7            |
| $(\text{H}_2\text{S}_2)_3$ | <b>3pa</b> | -8.2                    | -0.5            | -7.3                      | -3.5            |                                  |                 |
|                            | <b>3pb</b> | -9.0                    | -1.3            | -8.1                      | -4.2            |                                  |                 |
|                            | <b>3pc</b> | -10.2                   | -1.6            | -9.3                      | -5.0            |                                  |                 |
|                            | <b>3pd</b> | -8.7                    | -0.9            | -9.2                      | -5.4            |                                  |                 |
|                            | <b>3pe</b> | -9.6                    | -1.4            | -9.8                      | -5.4            |                                  |                 |
|                            | <b>3pf</b> | -9.6                    | -1.0            | -9.8                      | -5.5            |                                  |                 |
|                            | <b>3pg</b> | -9.6                    | -1.4            | -9.9                      | -5.6            |                                  |                 |
|                            | <b>3ph</b> | -9.6                    | -0.8            | -10.0                     | -5.6            |                                  |                 |
|                            | <b>3pi</b> | -9.2                    | -1.2            | -9.8                      | -5.8            |                                  |                 |
|                            | <b>3pj</b> | -10.2                   | -1.3            | -10.2                     | -5.8            |                                  |                 |
|                            | <b>3pk</b> | -9.7                    | -1.3            | -10.3                     | -5.9            |                                  |                 |
|                            | <b>3pl</b> | -9.6                    | -1.5            | -10.6                     | -6.2            |                                  |                 |
|                            | <b>3pm</b> | -10.0                   | -1.5            | -10.2                     | -5.9            |                                  |                 |
|                            | <b>3pn</b> | -10.9                   | -1.8            | -10.8                     | -6.3            |                                  |                 |
| <b>3po</b>                 | -10.3      | -1.5                    | -10.7           | -6.3                      |                 |                                  |                 |
| <b>3pp</b>                 | -10.0      | -1.7                    | -11.1           | -6.7                      |                 |                                  |                 |

<sup>a</sup> Energies are calculated for MP2(full)/6-311++G(3df,3pd) geometries. <sup>b</sup> Could not be performed on the trimer as the calculations are computationally prohibitive.

Note: MP2(full)/6-311++G(d,p) predict very low BSSE-corrected binding energies due to very large BSSE (72–99 % of the  $E$  values). This highlights the criticalness of have large diffuse functions for studying these highly polarizable clusters. Binding energies calculated with CCSD(T)/6-311++G(3df,3pd) are in good agreement with those from MP2(full)/6-311++G(3df,3pd) and from the optimized additive model for  $\text{H}_2\text{S}_2$  (Table 1 of the main text).

**Table S3.** Binding energies ( $E$  and  $E^{\text{CP}}$ , kcal/mol) for the  $\text{H}_2\text{S}_2\cdot\text{H}_2\text{O}$ ,  $(\text{H}_2\text{O})_2\cdot\text{H}_2\text{S}_2$ , and  $(\text{H}_2\text{S}_2)_2\cdot\text{H}_2\text{O}$  complexes shown in Figure 3 of the main text.<sup>a</sup>

| Complex                                           | Structure   | MP2(full)/<br>6-311++G(d,p) |                 | CCSD(T)/<br>6-311++G(3df,3pd) |                 | CCSD(T)/<br>aug-cc-pV5Z |                 |
|---------------------------------------------------|-------------|-----------------------------|-----------------|-------------------------------|-----------------|-------------------------|-----------------|
|                                                   |             | $E$                         | $E^{\text{CP}}$ | $E$                           | $E^{\text{CP}}$ | $E$                     | $E^{\text{CP}}$ |
| $\text{H}_2\text{S}_2\cdot\text{H}_2\text{O}$     | <b>pwa</b>  | -3.3                        | -1.9            | -2.9                          | -2.2            | -2.6                    | -2.5            |
|                                                   | <b>pwb</b>  | -4.8                        | -2.8            | -4.6                          | -3.6            | -4.4                    | -4.2            |
| $(\text{H}_2\text{O})_2\cdot\text{H}_2\text{S}_2$ | <b>2wpa</b> | -8.0                        | -4.5            | -7.6                          | -5.6            |                         |                 |
|                                                   | <b>2wpb</b> | -9.6                        | -5.1            | -9.2                          | -6.9            |                         |                 |
|                                                   | <b>2wpc</b> | -9.9                        | -5.4            | -9.4                          | -7.2            |                         |                 |
|                                                   | <b>2wpd</b> | -9.8                        | -5.8            | -9.4                          | -7.3            |                         |                 |
|                                                   | <b>2wpe</b> | -11.0                       | -6.1            | -10.2                         | -7.9            |                         |                 |
|                                                   | <b>2wpf</b> | -11.8                       | -7.7            | -10.3                         | -8.3            |                         |                 |
|                                                   | <b>2wpg</b> | -12.8                       | -8.1            | -11.7                         | -9.4            |                         |                 |
|                                                   | <b>2wph</b> | -13.0                       | -8.2            | -11.8                         | -9.5            |                         |                 |
|                                                   | <b>2wpi</b> | -13.2                       | -8.3            | -12.0                         | -9.7            |                         |                 |
|                                                   | <b>2wpj</b> | -13.6                       | -8.3            | -12.3                         | -10.0           |                         |                 |
|                                                   | <b>2wpk</b> | -14.7                       | -9.3            | -13.1                         | -10.6           |                         |                 |
| <b>2wpl</b>                                       | -15.1       | -9.6                        | -13.5           | -10.9                         |                 |                         |                 |
| $(\text{H}_2\text{S}_2)_2\cdot\text{H}_2\text{O}$ | <b>2pwa</b> | -7.9                        | -2.8            | -7.5                          | -4.7            |                         |                 |
|                                                   | <b>2pwb</b> | -8.3                        | -2.0            | -8.0                          | -4.9            |                         |                 |
|                                                   | <b>2pwc</b> | -7.2                        | -1.8            | -7.7                          | -4.9            |                         |                 |
|                                                   | <b>2pwd</b> | -8.2                        | -4.2            | -8.0                          | -5.8            |                         |                 |
|                                                   | <b>2pwe</b> | -8.5                        | -2.3            | -8.4                          | -5.2            |                         |                 |
|                                                   | <b>2pwf</b> | -8.7                        | -0.9            | -8.1                          | -4.6            |                         |                 |
|                                                   | <b>2pwg</b> | -8.8                        | -2.9            | -8.1                          | -5.3            |                         |                 |
|                                                   | <b>2pwh</b> | -8.5                        | -2.8            | -8.2                          | -5.3            |                         |                 |
|                                                   | <b>2pwi</b> | -8.6                        | -2.6            | -8.9                          | -5.6            |                         |                 |
|                                                   | <b>2pwj</b> | -10.2                       | -3.8            | -8.6                          | -5.7            |                         |                 |
|                                                   | <b>2pwk</b> | -9.3                        | -2.8            | -8.9                          | -5.7            |                         |                 |
|                                                   | <b>2pwl</b> | -10.2                       | -3.4            | -9.0                          | -6.0            |                         |                 |
|                                                   | <b>2pwm</b> | -8.8                        | -3.0            | -8.9                          | -5.9            |                         |                 |
|                                                   | <b>2pwn</b> | -9.8                        | -3.5            | -9.4                          | -6.3            |                         |                 |
|                                                   | <b>2pwo</b> | -9.6                        | -2.4            | -9.2                          | -5.9            |                         |                 |
|                                                   | <b>2pwp</b> | -10.1                       | -3.3            | -9.3                          | -6.1            |                         |                 |
|                                                   | <b>2pwq</b> | -10.6                       | -4.7            | -9.4                          | -6.6            |                         |                 |
| <b>2pwr</b>                                       | -10.3       | -4.1                        | -10.0           | -6.8                          |                 |                         |                 |
| <b>2pws</b>                                       | -9.6        | -3.5                        | -9.6            | -6.6                          |                 |                         |                 |
| <b>2pwt</b>                                       | -10.5       | -4.4                        | -10.1           | -6.9                          |                 |                         |                 |
| <b>2pwu</b>                                       | -12.4       | -5.6                        | -11.0           | -8.0                          |                 |                         |                 |
| <b>2pww</b>                                       | -12.4       | -5.4                        | -11.4           | -8.2                          |                 |                         |                 |

<sup>a</sup> Energies are calculated for MP2(full)/6-311++G(3df,3pd) geometries. <sup>b</sup> Could not be performed on the trimers as the calculations are computationally prohibitive.

**Table S4.** Binding energies ( $E$  and  $E^{\text{CP}}$ , kcal/mol) for  $\text{H}_2\text{S}_2$  complexes presented in Figure 4.<sup>a</sup>

| Ligand                      | Conformer  | MP2(full)/<br>6-311++G(d,p) |                 | CCSD(T)/<br>6-311++G(3df,3pd) |                 |
|-----------------------------|------------|-----------------------------|-----------------|-------------------------------|-----------------|
|                             |            | $E$                         | $E^{\text{CP}}$ | $E$                           | $E^{\text{CP}}$ |
| Ethane                      | <b>1a</b>  | -1.4                        | 0.1             | -1.8                          | -0.7            |
|                             | <b>1b</b>  | -2.5                        | 0.1             | -2.4                          | -1.0            |
| Acetamide                   | <b>2a</b>  | -4.5                        | -0.9            | -4.3                          | -2.5            |
|                             | <b>2b</b>  | -7.4                        | -3.8            | -6.8                          | -5.1            |
|                             | <b>2c</b>  | -8.5                        | -5.0            | -8.5                          | -6.7            |
| NMA                         | <b>3a</b>  | -6.0                        | -1.1            | -5.1                          | -2.7            |
|                             | <b>3b</b>  | -6.8                        | -1.9            | -5.6                          | -3.4            |
|                             | <b>3c</b>  | -7.8                        | -4.1            | -7.1                          | -5.3            |
|                             | <b>3d</b>  | -8.2                        | -3.3            | -7.4                          | -5.1            |
| Methylamine                 | <b>4a</b>  | -3.1                        | -0.3            | -3.1                          | -1.7            |
|                             | <b>4b</b>  | -7.5                        | -4.2            | -6.3                          | -4.8            |
| Methylammonium <sup>+</sup> | <b>5a</b>  | -12.0                       | -8.5            | -12.1                         | -10.4           |
|                             | <b>5b</b>  | -14.2                       | -10.7           | -13.9                         | -12.1           |
|                             | <b>5c</b>  | -14.3                       | -10.8           | -13.9                         | -12.2           |
| Methylguanidinium           | <b>6a</b>  | -10.9                       | -6.4            | -10.3                         | -8.0            |
|                             | <b>6b</b>  | -11.4                       | -7.2            | -11.4                         | -9.2            |
|                             | <b>6c</b>  | -12.1                       | -7.5            | -11.7                         | -9.4            |
|                             | <b>6d</b>  | -13.7                       | -9.3            | -12.9                         | -10.8           |
| Methane thiol               | <b>7a</b>  | -3.2                        | 0.1             | -3.1                          | -1.6            |
|                             | <b>7b</b>  | -4.9                        | -1.6            | -4.6                          | -3.0            |
|                             | <b>7c</b>  | -4.8                        | -1.3            | -4.9                          | -3.2            |
| Methanethiolate             | <b>8a</b>  | -15.8                       | -10.4           | -14.6                         | -12.2           |
|                             | <b>8b</b>  | -17.3                       | -11.1           | -15.9                         | -13.2           |
|                             | <b>8c</b>  | -19.2                       | -13.5           | -17.5                         | -15.1           |
|                             | <b>8d</b>  | -31.7                       | -24.1           | -29.1                         | -26.0           |
| DMS                         | <b>9a</b>  | -3.5                        | -0.0            | -3.0                          | -1.3            |
|                             | <b>9b</b>  | -4.8                        | -1.5            | -4.5                          | -2.9            |
|                             | <b>9c</b>  | -5.6                        | -1.8            | -5.6                          | -3.5            |
| DMDS                        | <b>10a</b> | -5.1                        | -0.8            | -4.8                          | -2.7            |
|                             | <b>10b</b> | -5.3                        | -1.2            | -5.1                          | -2.9            |
|                             | <b>10c</b> | -5.9                        | -1.1            | -5.6                          | -3.1            |
|                             | <b>10d</b> | -5.7                        | -1.3            | -5.4                          | -3.2            |
| Methanol                    | <b>11a</b> | -3.6                        | -1.1            | -3.8                          | -2.4            |
|                             | <b>11b</b> | -5.7                        | -2.9            | -4.6                          | -3.3            |
|                             | <b>11c</b> | -5.6                        | -3.1            | -5.1                          | -3.8            |
|                             | <b>11d</b> | -5.7                        | -2.6            | -5.6                          | -4.1            |
| Acetic acid                 | <b>12a</b> | -5.3                        | -1.4            | -4.4                          | -2.6            |
|                             | <b>12b</b> | -5.7                        | -2.6            | -5.3                          | -3.8            |
|                             | <b>12c</b> | -8.4                        | -4.9            | -8.4                          | -6.6            |
| Acetate                     | <b>13a</b> | -18.8                       | -14.4           | -17.5                         | -15.6           |
|                             | <b>13b</b> | -25.4                       | -20.0           | -23.5                         | -21.1           |
|                             | <b>13c</b> | -31.4                       | -25.7           | -30.0                         | -27.3           |
|                             | <b>13d</b> | -34.3                       | -27.4           | -32.0                         | -29.0           |

<sup>a</sup> Energies are calculated for MP2(full)/6-311++G(3df,3pd) geometries

**Table S5.** Binding energies ( $E$  and  $E^{\text{CP}}$ , kcal/mol) for the  $\text{H}_2\text{S}_2$  complexes presented in Figure 5.<sup>a</sup>

| Ligand              | Conformer  | MP2(full)/<br>6-311++G(d,p) |                 | CCSD(T)/<br>6-311++G(3df,3pd) |                 |
|---------------------|------------|-----------------------------|-----------------|-------------------------------|-----------------|
|                     |            | $E$                         | $E^{\text{CP}}$ | $E$                           | $E^{\text{CP}}$ |
| Toluene             | <b>14a</b> | -8.81                       | -2.9            | -6.4                          | -3.5            |
| 3-Methylindole      | <b>15a</b> | -10.4                       | -3.6            | -6.9                          | -3.8            |
|                     | <b>15b</b> | -11.7                       | -4.3            | -7.7                          | -4.5            |
|                     | <b>15c</b> | -11.7                       | -3.9            | -7.7                          | -4.2            |
|                     | <b>15d</b> | -13.0                       | -4.7            | -8.6                          | -5.0            |
|                     | <b>15e</b> | -13.2                       | -5.0            | -8.7                          | -5.1            |
| 4-Methylphenol      | <b>16a</b> | -7.8                        | -1.2            | -4.7                          | -1.9            |
|                     | <b>16b</b> | -7.6                        | -1.1            | -4.9                          | -1.9            |
|                     | <b>16c</b> | -9.3                        | -2.9            | -6.5                          | -3.6            |
|                     | <b>16d</b> | -10.0                       | -3.3            | -7.0                          | -4.0            |
|                     | <b>16e</b> | -10.1                       | -3.3            | -7.1                          | -4.0            |
| 4-Methylimidazole   | <b>17a</b> | -6.9                        | -1.1            | -4.6                          | -2.1            |
|                     | <b>17b</b> | -7.8                        | -2.6            | -5.8                          | -3.4            |
|                     | <b>17c</b> | -8.1                        | -3.2            | -6.0                          | -3.9            |
|                     | <b>17d</b> | -8.3                        | -3.2            | -6.2                          | -3.8            |
|                     | <b>17e</b> | -8.4                        | -5.0            | -7.1                          | -5.5            |
|                     | <b>17f</b> | -9.9                        | -3.9            | -7.2                          | -4.7            |
| 4-Methylimidazolium | <b>18a</b> | -10.9                       | -6.5            | -9.9                          | -8.0            |
|                     | <b>18b</b> | -12.7                       | -8.6            | -11.4                         | -9.3            |
|                     | <b>18c</b> | -12.6                       | -8.3            | -11.4                         | -9.3            |
|                     | <b>18d</b> | -12.9                       | -8.8            | -11.5                         | -9.7            |
| 4-Methylphenolate   | <b>19a</b> | -23.3                       | -15.0           | -19.9                         | -16.3           |
|                     | <b>19b</b> | -29.3                       | -21.2           | -25.9                         | -22.7           |
|                     | <b>19c</b> | -29.1                       | -22.5           | -26.3                         | -23.6           |

<sup>a</sup> Energies are calculated for MP2(full)/6-311++G(3df,3pd) geometries

Note: Freezing the core electrons has very little effect on MP2 calculations. With the same basis set, it results in a slightly weaker interaction (most likely because of lower dispersion interactions) and a slightly lower BSSE (anticipated for fewer electronic degrees of freedom), and these slight differences compensate each other. For example geometry optimization and interaction energy calculations for conformers **2pa** and **2pf** of  $(\text{H}_2\text{S}_2)_2$ , conformer **2c** of  $\text{H}_2\text{S}_2$ -acetamide, and conformer **5c** of  $\text{H}_2\text{S}_2$ -methylammonium with MP2(fc)/6-311++G(3df,3pd) result in structures with  $\leq 0.02$  Å longer H-bonds and  $\leq 0.4$  kcal/mol smaller BSSE, and the same BSSE-corrected interaction energies as those determined with MP2(full)/6-311++G(3df,3pd).



**Table S6.** Density of liquid H<sub>2</sub>S<sub>2</sub> calculated with the optimized additive model vs  $T$  and  $p$

| $T$ (K) | $p$ (atm) | density (g/cm <sup>3</sup> ) |
|---------|-----------|------------------------------|
| 233.15  | 0.0018    | 1.382                        |
| 243.15  | 0.0043    | 1.370                        |
| 253.15  | 0.0094    | 1.359                        |
| 263.15  | 0.0192    | 1.348                        |
| 273.15  | 0.0381    | 1.337                        |
| 283.15  | 0.0707    | 1.326                        |
| 293.15  | 0.1256    | 1.315                        |
| 303.15  | 0.2103    | 1.303                        |
| 313.15  | 0.3459    | 1.291                        |
| 323.15  | 0.5547    | 1.281                        |
| 333.15  | 0.8523    | 1.269                        |

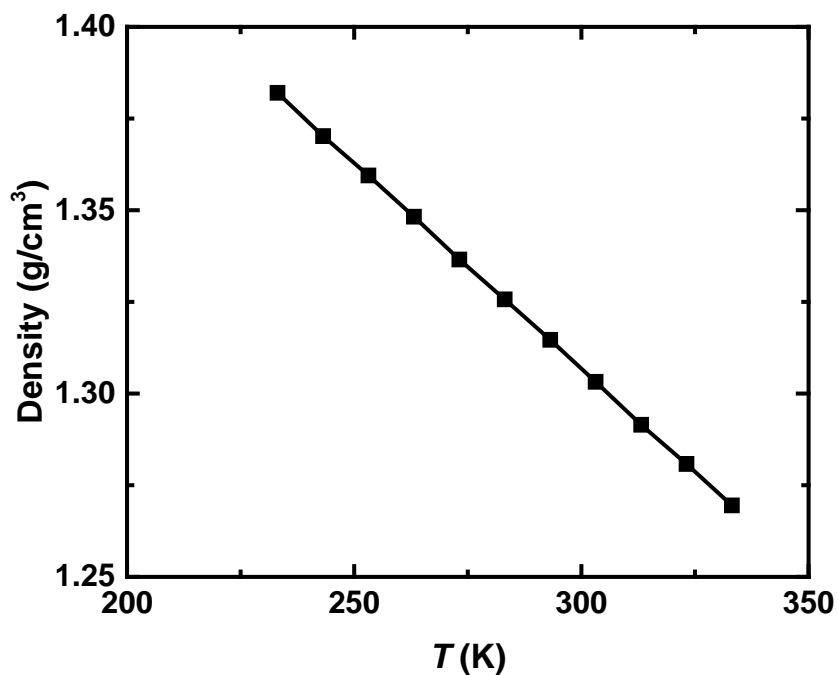

**Figure S2.** Calculated density of liquid H<sub>2</sub>S<sub>2</sub> vs temperature. Data from Table S6.

**Atomic coordinates of the structures presented in Figure 1–5 of the main text**

**Optimized conformers for the H<sub>2</sub>S<sub>2</sub> monomer (Fig. 1A)**

***Conformer Pa***

|   |              |              |              |
|---|--------------|--------------|--------------|
| S | 0.000000000  | 1.024270000  | -0.054576000 |
| H | 0.939714000  | 1.214031000  | 0.873214000  |
| S | 0.000000000  | -1.024270000 | -0.054576000 |
| H | -0.939714000 | -1.214031000 | 0.873214000  |

***Conformer Pb***

|   |             |              |              |
|---|-------------|--------------|--------------|
| S | 0.000000000 | 1.052304000  | -0.077754000 |
| H | 0.000000000 | 1.200294000  | 1.244069000  |
| S | 0.000000000 | -1.052304000 | -0.077754000 |
| H | 0.000000000 | -1.200294000 | 1.244069000  |

***Conformer Pc***

|   |              |              |             |
|---|--------------|--------------|-------------|
| S | 0.000000000  | 1.046740000  | 0.000000000 |
| H | 1.329936000  | 1.110040000  | 0.000001000 |
| S | 0.000000000  | -1.046740000 | 0.000000000 |
| H | -1.329936000 | -1.110040000 | 0.000001000 |

**Optimized conformers for the (H<sub>2</sub>S<sub>2</sub>)<sub>2</sub> dimer (Fig. 2A)**

***Conformer 2pa***

|   |              |              |              |
|---|--------------|--------------|--------------|
| S | -1.600006000 | 0.772241000  | 0.695091000  |
| H | -2.587910000 | 0.399057000  | 1.512437000  |
| S | -1.760617000 | -0.758918000 | -0.659354000 |
| H | -2.609654000 | -0.165837000 | -1.500983000 |
| S | 1.671044000  | 0.683689000  | -0.765664000 |
| H | 2.386282000  | 1.622384000  | -0.142078000 |
| S | 1.821176000  | -0.783335000 | 0.655207000  |
| H | 0.705742000  | -0.474439000 | 1.326143000  |

***Conformer 2pb***

|   |              |              |              |
|---|--------------|--------------|--------------|
| S | -2.025879000 | 1.025425000  | 0.000607000  |
| H | -0.713305000 | 1.256026000  | 0.113661000  |
| S | -1.928205000 | -1.022764000 | -0.083250000 |
| H | -2.015715000 | -1.277590000 | 1.224226000  |
| S | 1.928678000  | 1.022507000  | 0.086135000  |
| H | 2.013159000  | 1.280971000  | -1.220837000 |
| S | 2.025597000  | -1.025356000 | -0.003664000 |
| H | 0.712805000  | -1.256411000 | -0.114291000 |

***Conformer 2pc***

|   |              |              |              |
|---|--------------|--------------|--------------|
| S | -1.803964000 | -0.821259000 | -0.626142000 |
| H | -0.658876000 | -0.550111000 | -1.263580000 |
| S | -1.705402000 | 0.705214000  | 0.737608000  |
| H | -2.414276000 | 1.610852000  | 0.059280000  |
| S | 1.782326000  | -0.735708000 | 0.671139000  |
| H | 2.581839000  | -0.097771000 | 1.528427000  |
| S | 1.717975000  | 0.707174000  | -0.782738000 |
| H | 0.636356000  | 1.350291000  | -0.321998000 |

***Conformer 2pd***

|   |              |              |              |
|---|--------------|--------------|--------------|
| S | 1.917466000  | -0.916847000 | -0.489036000 |
| H | 0.627161000  | -1.221315000 | -0.309365000 |
| S | 1.872670000  | 0.927494000  | 0.403608000  |
| H | 2.068180000  | 0.547271000  | 1.668068000  |
| S | -1.870903000 | -0.927538000 | 0.404013000  |
| H | -2.064390000 | -0.547736000 | 1.668944000  |
| S | -1.919337000 | 0.916787000  | -0.488385000 |
| H | -0.629290000 | 1.223450000  | -0.310841000 |

***Conformer 2pe***

|   |              |              |              |
|---|--------------|--------------|--------------|
| S | 1.718145000  | 0.322903000  | 1.001720000  |
| H | 0.626723000  | 1.087751000  | 0.857917000  |
| S | 1.753390000  | -0.425724000 | -0.907079000 |
| H | 2.549762000  | 0.495910000  | -1.453250000 |
| S | -1.833594000 | -0.969912000 | 0.283755000  |
| H | -0.727423000 | -0.978862000 | 1.036408000  |
| S | -1.732405000 | 0.984572000  | -0.319731000 |
| H | -0.937646000 | 0.805784000  | -1.379716000 |

***Conformer 2pf***

|   |              |              |              |
|---|--------------|--------------|--------------|
| S | 1.755101000  | 0.610632000  | -0.822614000 |
| H | 0.794371000  | 1.451489000  | -0.421405000 |
| S | 1.754508000  | -0.610685000 | 0.822872000  |
| H | 0.792960000  | -1.450500000 | 0.421475000  |
| S | -1.754510000 | -0.823101000 | -0.610451000 |
| H | -0.793680000 | -0.422073000 | -1.451185000 |
| S | -1.755053000 | 0.823089000  | 0.610186000  |
| H | -0.794394000 | 0.422118000  | 1.451227000  |

**Optimized conformers for the (H<sub>2</sub>S<sub>2</sub>)<sub>3</sub> trimer (Fig. 2B)**

***Conformer 3pa***

|   |              |              |              |
|---|--------------|--------------|--------------|
| H | 0.937237000  | 0.720969000  | -1.325671000 |
| H | -0.431834000 | 1.848998000  | 1.120976000  |
| S | 0.897408000  | 1.739928000  | 1.042044000  |
| S | 1.076589000  | 2.006344000  | -0.979304000 |
| H | -1.698955000 | -0.865847000 | 1.036315000  |
| H | -4.298999000 | -1.514520000 | -0.469602000 |
| S | -2.015891000 | -0.314699000 | -0.137503000 |
| S | -4.057771000 | -0.317868000 | 0.068866000  |
| S | 3.088324000  | -1.232746000 | 0.039122000  |
| H | 3.364193000  | -2.022829000 | 1.078732000  |
| S | 1.075125000  | -1.602862000 | -0.064855000 |
| H | 1.107816000  | -2.616328000 | -0.934655000 |

***Conformer 3pb***

|   |              |              |              |
|---|--------------|--------------|--------------|
| H | 0.803369000  | 1.443345000  | -1.184715000 |
| H | -0.767761000 | 1.525882000  | 1.384005000  |
| S | 0.082315000  | 2.506331000  | 1.061717000  |
| S | -0.133322000 | 2.374176000  | -0.970151000 |
| H | -2.611575000 | 0.253445000  | -1.084713000 |
| H | -2.751740000 | -2.791685000 | -0.656113000 |
| S | -1.788289000 | -0.405854000 | -0.267508000 |
| S | -3.054555000 | -1.917792000 | 0.305708000  |
| S | 3.464686000  | -1.432940000 | -0.005585000 |
| H | 3.385657000  | -2.389828000 | 0.920851000  |
| S | 1.484030000  | -0.894164000 | -0.023692000 |
| H | 1.064217000  | -1.717265000 | -0.987130000 |

***Conformer 3pc***

|   |              |              |              |
|---|--------------|--------------|--------------|
| H | -0.906690000 | -1.425840000 | 1.355992000  |
| H | -1.709319000 | 0.003671000  | -1.185875000 |
| S | -2.158118000 | -1.223246000 | -0.897140000 |
| S | -2.167040000 | -1.028525000 | 1.145517000  |
| H | -0.683156000 | 1.227981000  | 1.368504000  |
| H | -1.102180000 | 3.218466000  | -0.920996000 |
| S | 0.258576000  | 2.101962000  | 0.997237000  |
| S | -0.248546000 | 2.193603000  | -0.989149000 |
| S | 3.119871000  | -1.035162000 | 0.229164000  |
| H | 3.618058000  | -0.249414000 | -0.727288000 |
| S | 1.168162000  | -1.047891000 | -0.406024000 |
| H | 1.216808000  | -2.146725000 | -1.164007000 |

***Conformer 3pd***

|   |              |              |              |
|---|--------------|--------------|--------------|
| H | -0.973820000 | 0.397375000  | -1.213008000 |
| H | 0.947891000  | 0.540126000  | 1.130459000  |
| S | -0.001408000 | -0.403445000 | 1.038826000  |
| S | -0.017394000 | -0.520890000 | -1.009039000 |
| H | 3.837702000  | 1.548069000  | 1.040200000  |
| H | 2.580729000  | -1.232658000 | 0.592100000  |
| S | 3.177495000  | 1.194560000  | -0.065365000 |
| S | 3.660797000  | -0.797037000 | -0.067081000 |
| S | -3.683135000 | -0.766720000 | 0.122981000  |
| H | -2.638256000 | -1.279955000 | -0.536922000 |
| S | -3.220841000 | 1.211072000  | -0.140388000 |
| H | -2.402471000 | 1.346379000  | 0.908206000  |

***Conformer 3pe***

|   |              |              |              |
|---|--------------|--------------|--------------|
| H | -0.749762000 | -1.578738000 | 1.238359000  |
| H | -1.842249000 | 0.109578000  | -1.047706000 |
| S | -2.024912000 | -1.214478000 | -0.979077000 |
| S | -2.064033000 | -1.395356000 | 1.064356000  |
| H | -1.003985000 | 1.095190000  | 1.290330000  |
| H | 0.410894000  | 1.472711000  | -1.368336000 |
| S | -0.087811000 | 2.051600000  | 1.102987000  |
| S | -0.436599000 | 2.391378000  | -0.889835000 |
| S | 3.219018000  | -0.881376000 | 0.239474000  |
| H | 3.688010000  | 0.046271000  | -0.597042000 |
| S | 1.276215000  | -0.905887000 | -0.424337000 |
| H | 1.387034000  | -1.879115000 | -1.332677000 |

***Conformer 3pf***

|   |              |              |              |
|---|--------------|--------------|--------------|
| H | 3.808763000  | -0.896701000 | -1.271320000 |
| H | 0.812892000  | -0.697641000 | -0.759537000 |
| S | 1.590647000  | -1.548279000 | -0.076491000 |
| S | 3.306004000  | -0.424513000 | -0.128872000 |
| H | 0.913420000  | 0.666536000  | 1.259292000  |
| H | -1.160918000 | 1.292669000  | -0.969231000 |
| S | 0.256718000  | 1.827814000  | 1.131509000  |
| S | 0.080307000  | 1.791391000  | -0.913315000 |
| S | -3.219008000 | -0.254555000 | -0.569315000 |
| H | -4.096648000 | 0.087609000  | 0.376555000  |
| S | -1.957414000 | -1.395236000 | 0.576877000  |
| H | -1.193591000 | -0.398422000 | 1.037949000  |

***Conformer 3pg***

|   |              |              |              |
|---|--------------|--------------|--------------|
| H | -0.023615000 | -1.191705000 | -1.411010000 |
| H | -0.830094000 | -3.366004000 | 0.580886000  |
| S | -1.092626000 | -2.071293000 | 0.779890000  |
| S | -1.301704000 | -1.513810000 | -1.184147000 |
| H | 1.320993000  | -1.029725000 | 1.131916000  |
| H | 1.381658000  | 0.988896000  | -1.132380000 |
| S | 2.290129000  | -0.111272000 | 1.037256000  |
| S | 2.320668000  | 0.042508000  | -1.013251000 |
| S | -1.004971000 | 2.100590000  | -0.789561000 |
| H | -0.705548000 | 3.386533000  | -0.585798000 |
| S | -1.281672000 | 1.554509000  | 1.169104000  |
| H | -0.020570000 | 1.192265000  | 1.427737000  |

***Conformer 3ph***

|   |              |              |              |
|---|--------------|--------------|--------------|
| H | 2.992516000  | 0.596160000  | 0.357395000  |
| H | 0.806435000  | -1.057158000 | -0.886832000 |
| S | 1.610101000  | -1.579204000 | 0.045497000  |
| S | 3.288282000  | -0.482103000 | -0.376732000 |
| H | 0.833422000  | 0.468713000  | 1.263796000  |
| H | -1.149973000 | 1.390994000  | -0.889299000 |
| S | 0.380738000  | 1.731335000  | 1.177647000  |
| S | 0.135421000  | 1.763464000  | -0.860554000 |
| S | -3.250645000 | -0.150902000 | -0.600602000 |
| H | -4.132528000 | 0.194834000  | 0.339942000  |
| S | -2.045355000 | -1.357211000 | 0.539343000  |
| H | -1.246534000 | -0.399596000 | 1.021409000  |

***Conformer 3pi***

|   |              |              |              |
|---|--------------|--------------|--------------|
| H | 0.965470000  | 0.418463000  | 1.177622000  |
| H | -0.964622000 | 0.418070000  | -1.176833000 |
| S | -0.007936000 | -0.511154000 | -1.025618000 |
| S | 0.008736000  | -0.510827000 | 1.026865000  |
| H | -2.370088000 | 1.294136000  | 0.984141000  |
| H | -2.652194000 | -1.254871000 | -0.596623000 |
| S | -3.174592000 | 1.229140000  | -0.081779000 |
| S | -3.689519000 | -0.746607000 | 0.078621000  |
| S | 3.688462000  | -0.747001000 | -0.079326000 |
| H | 2.649144000  | -1.254492000 | 0.593434000  |
| S | 3.174853000  | 1.229149000  | 0.081487000  |
| H | 2.372226000  | 1.295483000  | -0.985735000 |

***Conformer 3pj***

|   |              |              |              |
|---|--------------|--------------|--------------|
| H | 1.348749000  | 0.466605000  | -1.061410000 |
| H | 3.124111000  | 0.378719000  | 1.467653000  |
| S | 2.495999000  | -0.688226000 | 0.967448000  |
| S | 2.532766000  | -0.156161000 | -1.013296000 |
| H | 0.280279000  | 0.732359000  | 1.055092000  |
| H | -1.845544000 | 1.100258000  | -1.072147000 |
| S | -0.583176000 | 1.757086000  | 1.097947000  |
| S | -0.858893000 | 1.992799000  | -0.920522000 |
| S | -0.856726000 | -1.700244000 | -0.457601000 |
| H | -0.521317000 | -2.545851000 | 0.520084000  |
| S | -2.731384000 | -1.203369000 | 0.208568000  |
| H | -2.363665000 | -0.162246000 | 0.970021000  |

***Conformer 3pk***

|   |              |              |              |
|---|--------------|--------------|--------------|
| H | 0.439376000  | 1.896167000  | 0.584094000  |
| H | -2.544939000 | 2.261802000  | 1.128931000  |
| S | -2.083822000 | 1.412669000  | 0.206674000  |
| S | -0.393355000 | 2.457636000  | -0.303739000 |
| H | -1.556405000 | -0.977324000 | 1.201435000  |
| H | 0.303289000  | -1.375099000 | -1.198046000 |
| S | -1.136115000 | -2.187086000 | 0.810145000  |
| S | -0.977817000 | -1.759347000 | -1.190519000 |
| S | 2.540035000  | -0.023096000 | -0.815398000 |
| H | 1.619492000  | 0.866035000  | -1.210418000 |
| S | 2.089068000  | -0.008655000 | 1.187616000  |
| H | 1.131274000  | -0.945519000 | 1.177530000  |

***Conformer 3pl***

|   |              |              |              |
|---|--------------|--------------|--------------|
| H | 0.023197000  | -1.172947000 | -1.296212000 |
| H | -1.617325000 | -0.971181000 | 1.279345000  |
| S | -1.364390000 | -2.142281000 | 0.683352000  |
| S | -1.287849000 | -1.433232000 | -1.240590000 |
| H | 1.166891000  | -1.303874000 | 0.978389000  |
| H | 1.511048000  | 0.960289000  | -1.029998000 |
| S | 2.171536000  | -0.423061000 | 1.070622000  |
| S | 2.406426000  | -0.029673000 | -0.934078000 |
| S | -0.863379000 | 2.182037000  | -0.803445000 |
| H | -0.470710000 | 3.448378000  | -0.636885000 |
| S | -1.108165000 | 1.709568000  | 1.180562000  |
| H | 0.120032000  | 1.225609000  | 1.402596000  |

***Conformer 3pm***

|   |              |              |              |
|---|--------------|--------------|--------------|
| H | 0.405981000  | 0.464877000  | -1.210957000 |
| H | -1.191837000 | 1.223219000  | 1.274177000  |
| S | 0.055699000  | 1.659428000  | 1.055515000  |
| S | -0.033915000 | 1.712750000  | -0.990399000 |
| H | -2.404081000 | 0.773150000  | -0.726985000 |
| H | -2.103720000 | -2.234681000 | -0.988407000 |
| S | -3.223770000 | -0.065826000 | -0.074602000 |
| S | -1.882801000 | -1.597496000 | 0.163642000  |
| S | 3.344569000  | -0.167607000 | -0.093497000 |
| H | 4.000609000  | -0.640859000 | 0.968118000  |
| S | 1.761225000  | -1.469294000 | -0.062850000 |
| H | 0.956932000  | -0.736981000 | 0.719130000  |

***Conformer 3pn***

|   |              |              |              |
|---|--------------|--------------|--------------|
| H | 0.087808000  | -1.417243000 | 0.558775000  |
| H | 2.614731000  | -0.002228000 | -0.473073000 |
| S | 2.666111000  | -1.088151000 | 0.310506000  |
| S | 0.923895000  | -1.953006000 | -0.337407000 |
| H | 1.299816000  | 0.920145000  | 1.313000000  |
| H | -0.104988000 | 1.032695000  | -1.361300000 |
| S | 0.491813000  | 1.940386000  | 0.988117000  |
| S | 0.838497000  | 1.922703000  | -1.033541000 |
| S | -2.355738000 | -0.375474000 | -0.991324000 |
| H | -3.366994000 | 0.475211000  | -1.182833000 |
| S | -2.493355000 | -0.539024000 | 1.050806000  |
| H | -1.669949000 | 0.472474000  | 1.350927000  |



***Conformer 3po***

|   |              |              |              |
|---|--------------|--------------|--------------|
| H | -2.821151000 | 0.780021000  | -0.738347000 |
| H | -1.043281000 | -1.005648000 | 0.886377000  |
| S | -1.811650000 | -1.513067000 | -0.084113000 |
| S | -3.347696000 | -0.164281000 | 0.048909000  |
| H | -0.340546000 | 0.281218000  | -1.157053000 |
| H | 1.195388000  | 1.300276000  | 1.244787000  |
| S | -0.032264000 | 1.581404000  | -1.015803000 |
| S | -0.085895000 | 1.627921000  | 1.032788000  |
| S | 1.929777000  | -1.540487000 | 0.177166000  |
| H | 2.222152000  | -2.221829000 | -0.932953000 |
| S | 3.245127000  | 0.011982000  | -0.067150000 |
| H | 2.429057000  | 0.810398000  | -0.771570000 |

***Conformer 3pp***

|   |              |              |              |
|---|--------------|--------------|--------------|
| H | -1.224432000 | 1.541656000  | -0.745852000 |
| H | 1.454461000  | 1.337933000  | 0.743562000  |
| S | 1.197792000  | 2.300060000  | -0.152742000 |
| S | -0.826272000 | 2.452090000  | 0.152714000  |
| H | 1.716963000  | -0.083318000 | -1.197025000 |
| H | 0.485044000  | -1.456733000 | 1.227052000  |
| S | 1.907973000  | -1.386919000 | -0.951532000 |
| S | 1.807434000  | -1.292109000 | 1.097524000  |
| S | -2.100823000 | -1.080130000 | 0.951612000  |
| H | -1.711740000 | 0.178616000  | 1.197015000  |
| S | -1.987033000 | -1.002408000 | -1.097440000 |
| H | -0.705437000 | -1.367515000 | -1.226922000 |

**Optimized conformers for the H<sub>2</sub>S<sub>2</sub>.H<sub>2</sub>O complex (Fig. 3A)**

***Conformer pwa***

|   |              |              |              |
|---|--------------|--------------|--------------|
| O | -3.068095000 | 0.207807000  | 0.095192000  |
| H | -3.171264000 | 0.162280000  | -0.856879000 |
| H | -3.566108000 | -0.542820000 | 0.422622000  |
| S | -0.080196000 | -0.257067000 | -0.089316000 |
| H | -0.524383000 | 0.799681000  | 0.588075000  |
| S | 1.928663000  | 0.157778000  | -0.035937000 |
| H | 2.231038000  | -0.492980000 | 1.088699000  |

***Conformer pwb***

|   |              |              |              |
|---|--------------|--------------|--------------|
| O | -2.447988000 | -0.081122000 | 0.091244000  |
| H | -1.821486000 | 0.623804000  | -0.101760000 |
| H | -3.158828000 | 0.044466000  | -0.538797000 |
| S | 0.703298000  | 1.022309000  | -0.083972000 |
| H | 0.743394000  | 1.276428000  | 1.225961000  |
| S | 0.816658000  | -1.024804000 | -0.002510000 |
| H | -0.498460000 | -1.255801000 | 0.068355000  |

**Optimized conformers for the 2H<sub>2</sub>O.H<sub>2</sub>S<sub>2</sub> complex (Fig. 3B)**

***Conformer 2wpa***

|   |              |              |              |
|---|--------------|--------------|--------------|
| O | 3.153141000  | -0.597005000 | -0.004238000 |
| H | 2.386998000  | -1.154872000 | -0.166589000 |
| H | 3.846077000  | -0.963101000 | -0.555590000 |
| O | -3.628767000 | -0.337404000 | 0.009078000  |
| H | -2.677463000 | -0.376797000 | -0.126693000 |
| H | -3.944923000 | 0.229354000  | -0.695319000 |
| S | -0.189942000 | -0.689264000 | -0.009881000 |
| H | -0.263798000 | -0.901872000 | 1.306767000  |
| S | 0.363381000  | 1.287458000  | 0.021932000  |
| H | 1.683099000  | 1.071454000  | 0.005890000  |

***Conformer 2wpb***

|   |              |              |              |
|---|--------------|--------------|--------------|
| O | 1.715016000  | 1.598657000  | -0.656598000 |
| H | 2.099820000  | 0.820530000  | -0.235209000 |
| H | 0.925707000  | 1.764577000  | -0.138245000 |
| O | 2.353420000  | -0.976593000 | 0.561085000  |
| H | 1.453884000  | -1.285596000 | 0.411646000  |
| H | 2.534798000  | -1.166332000 | 1.482668000  |
| S | -1.431044000 | 0.590159000  | 0.638493000  |
| H | -2.227610000 | 1.241459000  | -0.211035000 |
| S | -0.796251000 | -0.874440000 | -0.652465000 |
| H | -1.697373000 | -1.802651000 | -0.322176000 |

***Conformer 2wpc***

|   |              |              |              |
|---|--------------|--------------|--------------|
| O | -1.795197000 | 1.474662000  | 0.730833000  |
| H | -2.083555000 | 0.728615000  | 0.190425000  |
| H | -1.080257000 | 1.854057000  | 0.217593000  |
| O | -2.129005000 | -0.985700000 | -0.778921000 |
| H | -1.342710000 | -1.314551000 | -0.329538000 |
| H | -2.809492000 | -1.636764000 | -0.601213000 |

|   |             |              |              |
|---|-------------|--------------|--------------|
| S | 1.320163000 | 0.579750000  | -0.719154000 |
| H | 2.206821000 | 1.292748000  | -0.021954000 |
| S | 0.852508000 | -0.774891000 | 0.751416000  |
| H | 1.740064000 | -1.713532000 | 0.413191000  |

***Conformer 2wpd***

|   |              |              |              |
|---|--------------|--------------|--------------|
| O | 2.260181000  | 1.401054000  | -0.059586000 |
| H | 1.866224000  | 0.920598000  | 0.675862000  |
| H | 3.192483000  | 1.454031000  | 0.154754000  |
| O | -2.259054000 | 1.404554000  | 0.052604000  |
| H | -3.194292000 | 1.438346000  | -0.152775000 |
| H | -1.864706000 | 0.920471000  | -0.680277000 |
| S | 0.022987000  | -0.850251000 | 1.030080000  |
| H | -0.925161000 | 0.076326000  | 1.213729000  |
| S | -0.023597000 | -0.857291000 | -1.026231000 |
| H | 0.926197000  | 0.066044000  | -1.217033000 |

***Conformer 2wpe***

|   |              |              |              |
|---|--------------|--------------|--------------|
| O | -1.617716000 | 1.335531000  | 0.720617000  |
| H | -2.243762000 | 2.061035000  | 0.750054000  |
| H | -0.944909000 | 1.602153000  | 0.084421000  |
| O | -2.250899000 | -1.142408000 | -0.745256000 |
| H | -1.476089000 | -1.658248000 | -0.516377000 |
| H | -2.158419000 | -0.347779000 | -0.207457000 |
| S | 1.034152000  | -0.813399000 | 0.733885000  |
| H | 0.080019000  | -0.183351000 | 1.425261000  |
| S | 1.187859000  | 0.542489000  | -0.800482000 |
| H | 2.139895000  | 1.315770000  | -0.273230000 |

***Conformer 2wpf***

|   |              |              |              |
|---|--------------|--------------|--------------|
| O | -1.422698000 | -0.269166000 | 0.129680000  |
| H | -2.365502000 | -0.071691000 | 0.058662000  |
| H | -0.973430000 | 0.564134000  | -0.028949000 |
| O | -4.248896000 | 0.165227000  | -0.063940000 |
| H | -4.662155000 | -0.311521000 | -0.785884000 |
| H | -4.740500000 | -0.098649000 | 0.715749000  |
| S | 1.802647000  | -1.002111000 | -0.017942000 |
| H | 0.487672000  | -1.229047000 | 0.077105000  |
| S | 1.688960000  | 1.044773000  | -0.093206000 |
| H | 1.760945000  | 1.295677000  | 1.215769000  |

***Conformer 2wpg***

|   |              |              |              |
|---|--------------|--------------|--------------|
| O | 2.012922000  | -1.417857000 | -0.293027000 |
| H | 2.216856000  | -0.477908000 | -0.401646000 |
| H | 2.035208000  | -1.780678000 | -1.179023000 |
| O | 2.038897000  | 1.392103000  | -0.029930000 |
| H | 1.167454000  | 1.344736000  | 0.381277000  |
| H | 2.013858000  | 2.173797000  | -0.583402000 |
| S | -0.754884000 | -0.135162000 | 1.063018000  |
| H | 0.244831000  | -0.936016000 | 0.657278000  |
| S | -1.596864000 | 0.179861000  | -0.783083000 |
| H | -2.464795000 | -0.833086000 | -0.769780000 |

***Conformer 2wph***

|   |              |              |              |
|---|--------------|--------------|--------------|
| O | 2.064133000  | -1.213002000 | -0.665946000 |
| H | 2.890351000  | -1.675451000 | -0.523309000 |
| H | 2.249360000  | -0.287433000 | -0.448335000 |
| O | 1.962325000  | 1.444335000  | 0.277494000  |
| H | 1.110715000  | 1.233066000  | 0.679003000  |
| H | 1.783292000  | 2.189112000  | -0.299076000 |
| S | -0.758897000 | -0.455578000 | 0.973731000  |
| H | 0.258946000  | -1.087357000 | 0.367888000  |
| S | -1.620469000 | 0.357529000  | -0.702481000 |
| H | -2.434468000 | -0.653831000 | -1.008543000 |

***Conformer 2wpi***

|   |              |              |              |
|---|--------------|--------------|--------------|
| O | 2.040173000  | -1.411786000 | -0.266805000 |
| H | 2.214346000  | -0.465256000 | -0.375024000 |
| H | 2.061901000  | -1.770032000 | -1.154796000 |
| O | 1.959150000  | 1.408094000  | -0.181058000 |
| H | 1.151278000  | 1.345277000  | 0.343025000  |
| H | 2.526409000  | 2.009253000  | 0.304062000  |
| S | -0.751434000 | -0.125890000 | 1.064065000  |
| H | 0.239779000  | -0.940609000 | 0.666509000  |
| S | -1.604919000 | 0.168545000  | -0.780709000 |
| H | -2.486641000 | -0.831576000 | -0.734568000 |

***Conformer 2wpj***

|   |             |              |              |
|---|-------------|--------------|--------------|
| O | 2.075345000 | -1.258864000 | -0.509527000 |
| H | 2.132418000 | -0.296982000 | -0.429938000 |
| H | 2.108095000 | -1.431328000 | -1.451076000 |
| O | 1.677844000 | 1.479462000  | 0.227477000  |
| H | 1.008615000 | 1.147380000  | 0.840244000  |
| H | 2.258457000 | 2.026493000  | 0.759149000  |

|   |              |              |              |
|---|--------------|--------------|--------------|
| S | -0.828129000 | -0.462078000 | 0.995640000  |
| H | 0.170382000  | -1.221655000 | 0.521510000  |
| S | -1.488357000 | 0.257634000  | -0.811784000 |
| H | -0.639711000 | 1.282419000  | -0.925191000 |

***Conformer 2wpk***

|   |              |              |              |
|---|--------------|--------------|--------------|
| O | 2.003491000  | 1.424091000  | 0.276744000  |
| H | 2.224978000  | 0.499564000  | 0.081396000  |
| H | 2.519010000  | 1.938346000  | -0.345510000 |
| O | 2.122622000  | -1.309123000 | -0.263035000 |
| H | 1.166594000  | -1.419702000 | -0.168299000 |
| H | 2.508217000  | -1.958950000 | 0.326502000  |
| S | -1.201394000 | -1.024664000 | 0.059457000  |
| H | -1.330109000 | -1.106111000 | 1.385979000  |
| S | -1.304817000 | 1.014967000  | -0.147721000 |
| H | 0.001788000  | 1.282254000  | 0.022479000  |

***Conformer 2wpl***

|   |              |              |              |
|---|--------------|--------------|--------------|
| O | 2.136614000  | -1.316708000 | -0.146267000 |
| H | 2.411950000  | -1.709914000 | -0.976005000 |
| H | 1.174478000  | -1.413501000 | -0.129628000 |
| O | 1.983792000  | 1.453637000  | 0.151499000  |
| H | 2.214904000  | 0.515055000  | 0.063293000  |
| H | 2.435920000  | 1.748401000  | 0.942606000  |
| S | -1.312131000 | 0.995738000  | -0.205945000 |
| H | -0.010590000 | 1.289658000  | -0.042774000 |
| S | -1.182161000 | -1.026315000 | 0.121440000  |
| H | -1.281228000 | -1.035905000 | 1.452733000  |

**Optimized conformers for the 2H<sub>2</sub>S<sub>2</sub>.H<sub>2</sub>O complex (Fig. 3C)**

***Conformer 2pwa***

|   |              |              |              |
|---|--------------|--------------|--------------|
| S | -1.042711000 | 1.341740000  | -0.522038000 |
| H | 0.271377000  | 1.416546000  | -0.280270000 |
| S | -1.308744000 | -0.558646000 | 0.202057000  |
| H | -1.522128000 | -0.264112000 | 1.487375000  |
| S | 2.635347000  | 0.678075000  | 0.508945000  |
| H | 2.681218000  | 0.222128000  | 1.762669000  |
| S | 2.491829000  | -1.115502000 | -0.472464000 |
| H | 1.162604000  | -1.241794000 | -0.399542000 |
| O | -4.747922000 | -0.552659000 | 0.303397000  |
| H | -3.815689000 | -0.594791000 | 0.071244000  |
| H | -5.205542000 | -0.647371000 | -0.532673000 |

***Conformer 2pwb***

|   |              |              |              |
|---|--------------|--------------|--------------|
| S | -1.672437000 | -1.234671000 | -0.173723000 |
| H | -2.799973000 | -1.599131000 | -0.789182000 |
| S | -2.130750000 | 0.752305000  | 0.048024000  |
| H | -2.574903000 | 0.701228000  | 1.305411000  |
| S | 1.547654000  | -0.490462000 | 1.089349000  |
| H | 1.775710000  | -1.790845000 | 1.288498000  |
| S | 1.962313000  | -0.445887000 | -0.918832000 |
| H | 0.728577000  | -0.720474000 | -1.358011000 |
| O | 0.775261000  | 2.724825000  | -0.084832000 |
| H | 1.368561000  | 2.123133000  | -0.541569000 |
| H | -0.008531000 | 2.186919000  | 0.056417000  |

***Conformer 2pwc***

|   |              |              |              |
|---|--------------|--------------|--------------|
| S | 0.982168000  | -0.836667000 | -1.013822000 |
| H | -0.270849000 | -1.304177000 | -0.918938000 |
| S | 1.144780000  | -0.234012000 | 0.942267000  |
| H | 1.717456000  | -1.336458000 | 1.433052000  |
| S | -2.107070000 | 1.305804000  | -0.222439000 |
| H | -1.032745000 | 1.062908000  | -0.982080000 |
| S | -2.553702000 | -0.638690000 | 0.241244000  |
| H | -1.772912000 | -0.751934000 | 1.320326000  |
| O | 4.268110000  | 0.794172000  | -0.025752000 |
| H | 3.385153000  | 0.694186000  | 0.342310000  |
| H | 4.370192000  | 1.739145000  | -0.144660000 |

***Conformer 2pwd***

|   |              |              |              |
|---|--------------|--------------|--------------|
| S | 3.480224000  | -0.756336000 | -0.546587000 |
| H | 4.787478000  | -0.779130000 | -0.279885000 |
| S | 2.981152000  | 0.778722000  | 0.719449000  |
| H | 3.091388000  | 1.789697000  | -0.145433000 |
| S | -3.370037000 | 0.843486000  | -0.491842000 |
| H | -2.070482000 | 0.979754000  | -0.780403000 |
| S | -3.186630000 | -0.868981000 | 0.623394000  |
| H | -3.327170000 | -1.762075000 | -0.358762000 |
| O | -0.120668000 | 0.008543000  | -0.442066000 |
| H | -0.642997000 | -0.524730000 | 0.164911000  |
| H | 0.651778000  | 0.277900000  | 0.065472000  |

***Conformer 2pwe***

|   |              |              |              |
|---|--------------|--------------|--------------|
| S | -1.606830000 | -0.812316000 | -0.952847000 |
| H | -1.938648000 | -2.060369000 | -0.615580000 |
| S | -2.130145000 | 0.109895000  | 0.801817000  |

|   |              |              |              |
|---|--------------|--------------|--------------|
| H | -0.947020000 | -0.021248000 | 1.413701000  |
| S | 1.916488000  | -0.208826000 | -0.878869000 |
| H | 3.196686000  | 0.172439000  | -0.856041000 |
| S | 1.679305000  | -0.446425000 | 1.146030000  |
| H | 1.907725000  | -1.760312000 | 1.201733000  |
| O | 0.026780000  | 2.655852000  | -0.293270000 |
| H | 0.592967000  | 1.958055000  | -0.634651000 |
| H | -0.767038000 | 2.187368000  | -0.021111000 |

***Conformer 2pwf***

|   |              |              |              |
|---|--------------|--------------|--------------|
| S | 2.108670000  | 1.146610000  | -0.089974000 |
| H | 1.040750000  | 1.934764000  | -0.080168000 |
| S | 1.865169000  | 0.311016000  | 1.774585000  |
| H | 1.052212000  | -0.693323000 | 1.419973000  |
| S | -0.283860000 | -1.745281000 | -0.412394000 |
| H | 0.793543000  | -1.143300000 | -0.917917000 |
| S | -1.511801000 | -0.098451000 | -0.335192000 |
| H | -1.243198000 | 0.286560000  | 0.912860000  |
| O | 2.796920000  | -2.075684000 | -0.197144000 |
| H | 3.626539000  | -2.577574000 | -0.330745000 |
| H | 3.125376000  | -1.646549000 | 0.580222000  |

***Conformer 2pwg***

|   |              |              |              |
|---|--------------|--------------|--------------|
| S | -0.996432000 | -0.623860000 | 1.049676000  |
| H | -1.807188000 | -1.588582000 | 1.494025000  |
| S | -1.153469000 | -1.010277000 | -0.960910000 |
| H | -2.181155000 | -0.185628000 | -1.192713000 |
| S | 1.671670000  | 1.315327000  | -0.161114000 |
| H | 2.221611000  | 1.880133000  | 0.916237000  |
| S | 2.589750000  | -0.510530000 | -0.027840000 |
| H | 1.638207000  | -1.121993000 | 0.685663000  |
| O | -3.434160000 | 1.355379000  | -0.090920000 |
| H | -2.790597000 | 1.132432000  | 0.589271000  |
| H | -3.391905000 | 2.310039000  | -0.162119000 |

***Conformer 2pwh***

|   |              |              |              |
|---|--------------|--------------|--------------|
| S | 1.608879000  | 1.295772000  | 0.065918000  |
| H | 2.438789000  | 2.011085000  | -0.697860000 |
| S | 2.558101000  | -0.513456000 | -0.111131000 |
| H | 3.334127000  | -0.418215000 | 0.970146000  |
| S | -1.041753000 | -0.850058000 | 1.053571000  |
| H | -1.979431000 | 0.078779000  | 1.270984000  |
| S | -1.209651000 | -0.900960000 | -0.990062000 |
| H | -0.307201000 | 0.051750000  | -1.258404000 |

|   |              |             |              |
|---|--------------|-------------|--------------|
| O | -3.355290000 | 1.438136000 | 0.024236000  |
| H | -4.298566000 | 1.443433000 | -0.143756000 |
| H | -2.994617000 | 0.827305000 | -0.627721000 |

***Conformer 2pwi***

|   |              |              |              |
|---|--------------|--------------|--------------|
| S | 1.941753000  | -0.119369000 | -0.951903000 |
| H | 0.682939000  | -0.437836000 | -1.277368000 |
| S | 1.836285000  | -0.632978000 | 1.032304000  |
| H | 2.138174000  | -1.927747000 | 0.913033000  |
| S | -1.880283000 | -0.805773000 | -0.900202000 |
| H | -2.220006000 | -2.027196000 | -0.482598000 |
| S | -1.961322000 | 0.162325000  | 0.907404000  |
| H | -0.712384000 | -0.111784000 | 1.303596000  |
| O | 0.121404000  | 2.802388000  | -0.185112000 |
| H | -0.625702000 | 2.258459000  | 0.078064000  |
| H | 0.782813000  | 2.159726000  | -0.455494000 |

***Conformer 2pwj***

|   |              |              |              |
|---|--------------|--------------|--------------|
| S | 2.664855000  | -0.462374000 | -0.463113000 |
| H | 2.876890000  | -1.616117000 | 0.172305000  |
| S | 1.380997000  | 0.365783000  | 0.905260000  |
| H | 2.284047000  | 1.049958000  | 1.613283000  |
| S | -2.538550000 | -0.048259000 | 0.517492000  |
| H | -2.064310000 | 1.098277000  | 0.011531000  |
| S | -1.221936000 | -1.300318000 | -0.433250000 |
| H | -1.926759000 | -1.523474000 | -1.544803000 |
| O | -0.660113000 | 2.464308000  | -0.807586000 |
| H | -0.527313000 | 2.454995000  | -1.756925000 |
| H | 0.072493000  | 1.944572000  | -0.456911000 |

***Conformer 2pwk***

|   |              |              |              |
|---|--------------|--------------|--------------|
| S | 2.496664000  | -0.457044000 | -0.507614000 |
| H | 2.596130000  | -1.717301000 | -0.080943000 |
| S | 1.376616000  | 0.261563000  | 1.052024000  |
| H | 2.376850000  | 0.737436000  | 1.798248000  |
| S | -1.333098000 | -1.043841000 | -0.771498000 |
| H | -0.824246000 | 0.057298000  | -1.338638000 |
| S | -2.410974000 | -0.093989000 | 0.690962000  |
| H | -1.466492000 | -0.081514000 | 1.636592000  |
| O | -0.456536000 | 2.258410000  | -1.059110000 |
| H | -1.287495000 | 2.249887000  | -0.576697000 |
| H | 0.190203000  | 2.019872000  | -0.387676000 |



***Conformer 2pwl***

|   |              |              |              |
|---|--------------|--------------|--------------|
| S | 1.581635000  | -0.799951000 | 1.049344000  |
| H | 2.007322000  | 0.466904000  | 1.098905000  |
| S | 1.272873000  | -0.892209000 | -0.977980000 |
| H | 2.511729000  | -1.234220000 | -1.341194000 |
| S | -2.252130000 | -0.838666000 | -0.107920000 |
| H | -2.986944000 | -0.928710000 | 1.002529000  |
| S | -1.654779000 | 1.110942000  | 0.088512000  |
| H | -0.531597000 | 0.882868000  | 0.775806000  |
| O | 1.604535000  | 2.327231000  | -0.124545000 |
| H | 1.351605000  | 1.723928000  | -0.830750000 |
| H | 1.650011000  | 3.189524000  | -0.540221000 |

***Conformer 2pwm***

|   |              |              |              |
|---|--------------|--------------|--------------|
| S | 2.592590000  | -0.580696000 | 0.008747000  |
| H | 1.577830000  | -1.108106000 | 0.703153000  |
| S | 1.812218000  | 1.302955000  | -0.200106000 |
| H | 2.394365000  | 1.865497000  | 0.861892000  |
| S | -1.117343000 | -0.938111000 | -0.943403000 |
| H | -2.154360000 | -0.142328000 | -1.228080000 |
| S | -1.106283000 | -0.604006000 | 1.081653000  |
| H | -0.287437000 | 0.459119000  | 1.069621000  |
| O | -3.592717000 | 1.249534000  | -0.151494000 |
| H | -3.159893000 | 0.830716000  | 0.599467000  |
| H | -4.527668000 | 1.216570000  | 0.055636000  |

***Conformer 2pwn***

|   |              |              |              |
|---|--------------|--------------|--------------|
| S | 1.711445000  | -1.218590000 | -0.286372000 |
| H | 2.839055000  | -1.741006000 | 0.202562000  |
| S | 2.062298000  | 0.714875000  | 0.305538000  |
| H | 2.599232000  | 1.170768000  | -0.828450000 |
| S | -1.785208000 | -0.479121000 | -0.983162000 |
| H | -1.470320000 | 0.819821000  | -1.070181000 |
| S | -1.775619000 | -0.599271000 | 1.064503000  |
| H | -0.511065000 | -1.009225000 | 1.210832000  |
| O | -0.699388000 | 2.655862000  | -0.219681000 |
| H | -1.281093000 | 2.737948000  | 0.538810000  |
| H | 0.012651000  | 2.088505000  | 0.095762000  |

***Conformer 2pwo***

|   |             |             |              |
|---|-------------|-------------|--------------|
| S | 1.425955000 | 1.005125000 | -0.957116000 |
| H | 0.708216000 | 2.129559000 | -0.913858000 |
| S | 1.561604000 | 0.676601000 | 1.063227000  |

|   |              |              |              |
|---|--------------|--------------|--------------|
| H | 0.445107000  | -0.062779000 | 1.186068000  |
| S | -1.539019000 | -1.094397000 | 0.108721000  |
| H | -0.568189000 | -0.978838000 | -0.803340000 |
| S | -2.334620000 | 0.786561000  | -0.073055000 |
| H | -1.576467000 | 1.397872000  | 0.842613000  |
| O | 1.406272000  | -2.438552000 | -0.295983000 |
| H | 2.023343000  | -3.156225000 | -0.447349000 |
| H | 1.895095000  | -1.803404000 | 0.235291000  |

***Conformer 2pwp***

|   |              |              |              |
|---|--------------|--------------|--------------|
| S | 1.551605000  | 1.075963000  | 0.120351000  |
| H | 0.538392000  | 0.899808000  | -0.734203000 |
| S | 2.309724000  | -0.828610000 | 0.060999000  |
| H | 3.155901000  | -0.673874000 | -0.959396000 |
| S | -1.670487000 | -0.640252000 | 1.044731000  |
| H | -0.497902000 | -0.021268000 | 1.252496000  |
| S | -1.418962000 | -1.008828000 | -0.957238000 |
| H | -0.775836000 | -2.173270000 | -0.847331000 |
| O | -1.365886000 | 2.432771000  | -0.337831000 |
| H | -1.992811000 | 3.137708000  | -0.507063000 |
| H | -1.850733000 | 1.796360000  | 0.196657000  |

***Conformer 2pq***

|   |              |              |              |
|---|--------------|--------------|--------------|
| S | -2.226936000 | -0.899720000 | 0.335452000  |
| H | -3.499631000 | -0.533570000 | 0.504037000  |
| S | -1.632014000 | 0.713379000  | -0.785393000 |
| H | -1.099952000 | 1.447331000  | 0.198560000  |
| S | 1.421214000  | -1.266718000 | 0.621935000  |
| H | 1.523384000  | -2.393816000 | -0.085423000 |
| S | 2.110530000  | 0.025649000  | -0.813568000 |
| H | 0.916327000  | 0.320010000  | -1.346746000 |
| O | 0.626968000  | 2.404811000  | 1.068088000  |
| H | 1.326414000  | 1.873113000  | 0.671778000  |
| H | 1.053009000  | 2.887017000  | 1.778256000  |

***Conformer 2pwr***

|   |              |              |              |
|---|--------------|--------------|--------------|
| S | 1.773666000  | 0.818691000  | -0.569762000 |
| H | 0.574829000  | 0.453971000  | -1.046472000 |
| S | 2.268346000  | -0.951399000 | 0.345375000  |
| H | 2.862464000  | -1.540023000 | -0.694647000 |
| S | -1.979283000 | -0.042739000 | -0.993646000 |
| H | -1.784052000 | 1.130078000  | -0.374069000 |
| S | -1.685834000 | -1.239130000 | 0.651565000  |
| H | -0.368659000 | -1.424247000 | 0.520150000  |

|   |              |             |             |
|---|--------------|-------------|-------------|
| O | -0.790598000 | 2.456053000 | 0.980043000 |
| H | 0.083525000  | 2.055142000 | 0.933640000 |
| H | -1.073640000 | 2.309866000 | 1.884553000 |

*Conformer 2pws*

|   |              |              |              |
|---|--------------|--------------|--------------|
| S | 1.111872000  | -0.773726000 | 1.060479000  |
| H | 0.259621000  | 0.260297000  | 1.150484000  |
| S | 1.100272000  | -0.942704000 | -0.986733000 |
| H | 2.109731000  | -0.096486000 | -1.221699000 |
| S | -2.596154000 | -0.501578000 | -0.041602000 |
| H | -1.690397000 | -1.134267000 | 0.712294000  |
| S | -1.740570000 | 1.358587000  | 0.000999000  |
| H | -0.894613000 | 1.190676000  | -1.021547000 |
| O | 3.362913000  | 1.382476000  | -0.112281000 |
| H | 3.029337000  | 0.893363000  | 0.646539000  |
| H | 4.276315000  | 1.577353000  | 0.101898000  |

*Conformer 2pwt*

|   |              |              |              |
|---|--------------|--------------|--------------|
| S | -2.242338000 | 0.330620000  | 0.598104000  |
| H | -1.330345000 | 1.259559000  | 0.280849000  |
| S | -1.647675000 | -1.133806000 | -0.709339000 |
| H | -0.790640000 | -1.764818000 | 0.100334000  |
| S | 1.725284000  | -0.691725000 | 1.065142000  |
| H | 2.274478000  | -1.896660000 | 0.897100000  |
| S | 1.952801000  | -0.022332000 | -0.862018000 |
| H | 0.722182000  | -0.345271000 | -1.291392000 |
| O | 0.140329000  | 2.684454000  | -0.177371000 |
| H | 0.902518000  | 2.122362000  | -0.358715000 |
| H | 0.490035000  | 3.425084000  | 0.320574000  |

*Conformer 2pwu*

|   |              |              |              |
|---|--------------|--------------|--------------|
| S | -2.401103000 | -0.792904000 | -0.361649000 |
| H | -1.310966000 | -1.564020000 | -0.321222000 |
| S | -1.678248000 | 0.753822000  | 0.775073000  |
| H | -1.052551000 | 1.437411000  | -0.189340000 |
| S | 1.455806000  | -1.221156000 | -0.630762000 |
| H | 1.079766000  | -0.217237000 | -1.430184000 |
| S | 2.062036000  | -0.081305000 | 0.965603000  |
| H | 0.860053000  | 0.070843000  | 1.534745000  |
| O | 0.839439000  | 2.121613000  | -1.181954000 |
| H | 1.465692000  | 1.884907000  | -0.487952000 |
| H | 1.226639000  | 2.879889000  | -1.622648000 |

***Conformer 2pww***

|   |              |              |              |
|---|--------------|--------------|--------------|
| S | -2.196482000 | 0.636398000  | 0.410821000  |
| H | -1.158247000 | 1.344546000  | -0.049790000 |
| S | -1.767389000 | -1.155938000 | -0.489704000 |
| H | -0.987315000 | -1.661431000 | 0.471752000  |
| S | 1.593455000  | -0.504994000 | 1.181412000  |
| H | 1.141789000  | 0.748470000  | 1.288787000  |
| S | 1.938079000  | -0.500692000 | -0.841658000 |
| H | 0.694228000  | -0.824421000 | -1.227427000 |
| O | 0.644670000  | 2.455049000  | -0.382577000 |
| H | 0.842748000  | 3.316825000  | -0.752820000 |
| H | 1.226825000  | 1.839234000  | -0.843821000 |

**Optimized conformers for the H<sub>2</sub>S<sub>2</sub>.ethane complex**

***Conformer 1a***

|   |              |              |              |
|---|--------------|--------------|--------------|
| C | -2.130432000 | 0.293267000  | 0.027784000  |
| H | -1.361698000 | -0.470131000 | -0.074276000 |
| H | -1.987776000 | 1.012906000  | -0.775673000 |
| H | -1.957700000 | 0.811906000  | 0.968680000  |
| C | -3.520666000 | -0.317573000 | -0.018901000 |
| H | -3.690664000 | -0.835876000 | -0.960076000 |
| H | -3.661275000 | -1.037711000 | 0.784303000  |
| H | -4.290517000 | 0.444380000  | 0.082334000  |
| S | 1.254234000  | 1.004030000  | 0.000358000  |
| H | 2.513400000  | 1.445940000  | 0.028223000  |
| S | 1.663249000  | -1.002433000 | -0.083738000 |
| H | 1.663089000  | -1.251124000 | 1.227270000  |

***Conformer 1b***

|   |              |              |              |
|---|--------------|--------------|--------------|
| C | -2.281435000 | 0.303453000  | 0.686457000  |
| H | -2.262693000 | 1.384941000  | 0.568846000  |
| H | -3.145452000 | 0.050941000  | 1.297992000  |
| H | -1.390458000 | 0.012483000  | 1.239360000  |
| C | -2.337559000 | -0.396322000 | -0.660456000 |
| H | -3.237699000 | -0.123902000 | -1.207880000 |
| H | -1.481547000 | -0.127338000 | -1.275514000 |
| H | -2.333651000 | -1.477648000 | -0.541725000 |
| S | 1.288945000  | -0.997382000 | 0.054205000  |
| H | 1.843583000  | -1.027022000 | 1.267654000  |
| S | 1.054303000  | 1.032043000  | -0.106141000 |
| H | 2.229907000  | 1.310192000  | -0.673760000 |

## Optimized conformers for the H<sub>2</sub>S<sub>2</sub>.acetamide complex

### *Conformer 2a*

|   |              |              |              |
|---|--------------|--------------|--------------|
| C | 1.549906000  | -0.946652000 | -1.041552000 |
| H | 1.100425000  | -1.865487000 | -0.673668000 |
| H | 0.808504000  | -0.404055000 | -1.626353000 |
| H | 2.393174000  | -1.176604000 | -1.683077000 |
| C | 2.019663000  | -0.052503000 | 0.076987000  |
| O | 2.963784000  | 0.707359000  | -0.042104000 |
| H | 1.503046000  | 0.511939000  | 1.959880000  |
| H | 0.443221000  | -0.667365000 | 1.265370000  |
| N | 1.304955000  | -0.151562000 | 1.231160000  |
| S | -2.050535000 | -0.787916000 | 0.275679000  |
| H | -1.716675000 | -1.434445000 | -0.843947000 |
| S | -1.460216000 | 1.096548000  | -0.281147000 |
| H | -2.622048000 | 1.494892000  | -0.804627000 |

### *Conformer 2b*

|   |              |              |              |
|---|--------------|--------------|--------------|
| C | 1.452033000  | 0.871191000  | 0.983377000  |
| H | 0.583542000  | 1.354761000  | 0.541874000  |
| H | 1.112192000  | 0.321258000  | 1.856550000  |
| H | 2.172271000  | 1.624881000  | 1.288138000  |
| C | 2.002196000  | -0.106659000 | -0.015490000 |
| O | 1.344752000  | -1.048401000 | -0.437075000 |
| H | 3.667807000  | -0.512614000 | -1.110848000 |
| H | 3.813928000  | 0.885302000  | -0.096752000 |
| N | 3.271353000  | 0.113137000  | -0.431928000 |
| S | -1.855317000 | -0.956503000 | 0.364392000  |
| H | -0.551306000 | -1.108020000 | 0.066013000  |
| S | -2.071767000 | 0.944289000  | -0.376079000 |
| H | -2.347943000 | 0.637900000  | -1.645214000 |

### *Conformer 2c*

|   |              |              |              |
|---|--------------|--------------|--------------|
| C | -3.460543000 | -0.087205000 | -0.057759000 |
| H | -3.864437000 | -0.390337000 | 0.904034000  |
| H | -3.903794000 | 0.859618000  | -0.352120000 |
| H | -3.725971000 | -0.851158000 | -0.782753000 |
| C | -1.961546000 | -0.037823000 | 0.051935000  |
| O | -1.314558000 | -1.031583000 | 0.361233000  |
| H | -0.375184000 | 1.240655000  | -0.129344000 |
| H | -1.925925000 | 1.954501000  | -0.457716000 |
| N | -1.380094000 | 1.152687000  | -0.206638000 |
| S | 1.903828000  | -1.067731000 | -0.194358000 |
| H | 0.579322000  | -1.153367000 | 0.049620000  |

|   |             |             |             |
|---|-------------|-------------|-------------|
| S | 2.075420000 | 0.960569000 | 0.067484000 |
| H | 2.257675000 | 0.988707000 | 1.389815000 |

**Optimized conformers for the H<sub>2</sub>S<sub>2</sub>.N-methylacetamide complex**

*Conformer 3a*

|   |              |              |              |
|---|--------------|--------------|--------------|
| C | 1.199855000  | 1.891816000  | -0.293033000 |
| H | 0.630528000  | 1.961313000  | -1.216511000 |
| H | 0.578137000  | 2.217598000  | 0.538165000  |
| H | 2.059290000  | 2.553568000  | -0.346626000 |
| C | 1.682473000  | 0.495746000  | 0.000231000  |
| O | 2.468169000  | 0.250570000  | 0.903341000  |
| H | 0.428789000  | -0.251155000 | -1.421790000 |
| N | 1.183290000  | -0.479517000 | -0.799059000 |
| C | 1.472449000  | -1.865682000 | -0.517989000 |
| H | 0.987219000  | -2.483739000 | -1.266825000 |
| H | 2.544836000  | -2.036994000 | -0.550054000 |
| H | 1.113676000  | -2.146803000 | 0.471462000  |
| S | -2.263605000 | 0.140987000  | -0.709024000 |
| H | -2.198926000 | 1.472240000  | -0.627622000 |
| S | -1.351643000 | -0.310416000 | 1.073315000  |
| H | -2.456622000 | -0.354371000 | 1.822565000  |

*Conformer 3b*

|   |              |              |              |
|---|--------------|--------------|--------------|
| C | -1.254214000 | 1.872743000  | -0.184597000 |
| H | -0.608286000 | 2.115767000  | 0.657906000  |
| H | -0.679598000 | 1.959072000  | -1.103336000 |
| H | -2.073698000 | 2.583844000  | -0.195121000 |
| C | -1.814569000 | 0.490441000  | 0.024833000  |
| O | -2.750415000 | 0.262524000  | 0.776632000  |
| H | -0.392255000 | -0.279130000 | -1.230457000 |
| N | -1.179900000 | -0.503356000 | -0.646147000 |
| C | -1.582540000 | -1.880091000 | -0.478003000 |
| H | -2.597829000 | -2.032998000 | -0.836549000 |
| H | -0.902614000 | -2.513580000 | -1.038807000 |
| H | -1.554338000 | -2.161768000 | 0.572942000  |
| S | 2.219517000  | 0.174532000  | -0.816376000 |
| H | 2.115241000  | 1.501858000  | -0.714562000 |
| S | 1.804356000  | -0.311753000 | 1.131512000  |
| H | 0.481954000  | -0.452794000 | 0.982392000  |

***Conformer 3c***

|   |              |              |              |
|---|--------------|--------------|--------------|
| C | -0.817909000 | 1.353915000  | -0.943580000 |
| H | 0.042730000  | 1.601250000  | -0.325961000 |
| H | -0.446595000 | 1.047721000  | -1.917833000 |
| H | -1.446551000 | 2.233032000  | -1.057283000 |
| C | -1.533389000 | 0.194221000  | -0.312552000 |
| O | -0.995961000 | -0.897574000 | -0.144150000 |
| H | -3.219746000 | 1.309459000  | -0.071947000 |
| N | -2.808551000 | 0.406562000  | 0.072665000  |
| C | -3.572782000 | -0.643496000 | 0.705987000  |
| H | -4.567606000 | -0.270110000 | 0.924630000  |
| H | -3.647206000 | -1.507531000 | 0.050697000  |
| H | -3.094618000 | -0.960865000 | 1.629369000  |
| S | 2.257231000  | -0.890870000 | -0.552324000 |
| H | 0.916359000  | -0.987403000 | -0.456587000 |
| S | 2.496425000  | 0.670122000  | 0.757191000  |
| H | 2.576765000  | -0.026762000 | 1.892454000  |

***Conformer 3d***

|   |              |              |              |
|---|--------------|--------------|--------------|
| C | -2.037585000 | -1.701303000 | 0.145532000  |
| H | -1.164662000 | -2.349013000 | 0.136323000  |
| H | -2.663935000 | -1.991544000 | 0.983876000  |
| H | -2.589103000 | -1.832395000 | -0.781725000 |
| C | -1.566814000 | -0.291904000 | 0.362801000  |
| O | -1.033720000 | 0.059849000  | 1.410795000  |
| H | -2.135603000 | 0.222650000  | -1.519737000 |
| N | -1.769736000 | 0.573788000  | -0.654332000 |
| C | -1.277765000 | 1.930015000  | -0.585413000 |
| H | -1.710617000 | 2.505591000  | -1.397325000 |
| H | -1.567899000 | 2.372312000  | 0.363195000  |
| H | -0.190656000 | 1.964607000  | -0.655205000 |
| S | 2.118514000  | 0.423794000  | 0.702745000  |
| H | 0.899378000  | 0.443633000  | 1.266222000  |
| S | 1.617132000  | -0.775614000 | -0.882427000 |
| H | 1.303664000  | 0.177120000  | -1.764267000 |

**Optimized conformers for the H<sub>2</sub>S<sub>2</sub>.methylamine complex**

***Conformer 4a***

|   |             |              |              |
|---|-------------|--------------|--------------|
| C | 2.319191000 | 0.146700000  | 0.646878000  |
| H | 3.235867000 | -0.301941000 | 1.021805000  |
| H | 2.403725000 | 1.221378000  | 0.790234000  |
| H | 1.489795000 | -0.219027000 | 1.260426000  |
| N | 2.193260000 | -0.134919000 | -0.775520000 |

|   |              |              |              |
|---|--------------|--------------|--------------|
| H | 2.108798000  | -1.129661000 | -0.933751000 |
| H | 1.350965000  | 0.289193000  | -1.141256000 |
| S | -1.204732000 | 1.021790000  | -0.124122000 |
| H | -0.539719000 | 1.335778000  | 0.990337000  |
| S | -1.111180000 | -1.017496000 | 0.052720000  |
| H | -2.262814000 | -1.200181000 | 0.702014000  |

***Conformer 4b***

|   |              |              |              |
|---|--------------|--------------|--------------|
| C | 2.369656000  | -0.264994000 | -0.638393000 |
| H | 1.492699000  | -0.645914000 | -1.155427000 |
| H | 2.691229000  | 0.635403000  | -1.154993000 |
| H | 3.164298000  | -1.009016000 | -0.713426000 |
| N | 1.993835000  | 0.078609000  | 0.730141000  |
| H | 1.683143000  | -0.746138000 | 1.226506000  |
| H | 2.783248000  | 0.451872000  | 1.239490000  |
| S | -1.379079000 | -0.935818000 | -0.047644000 |
| H | -1.860891000 | -1.026400000 | 1.193677000  |
| S | -1.019743000 | 1.084585000  | -0.094515000 |
| H | 0.252648000  | 0.999617000  | 0.358091000  |

**Optimized conformers for the H<sub>2</sub>S<sub>2</sub>.methylammonium complex**

***Conformer 5a***

|   |              |              |              |
|---|--------------|--------------|--------------|
| C | -2.333170000 | -0.534130000 | -0.627999000 |
| H | -1.558450000 | -1.286217000 | -0.719787000 |
| H | -3.314781000 | -0.991331000 | -0.615262000 |
| H | -2.257653000 | 0.182128000  | -1.437072000 |
| H | -1.170771000 | 0.620491000  | 0.654671000  |
| H | -2.803382000 | 0.936350000  | 0.786794000  |
| H | -2.186820000 | -0.434261000 | 1.456693000  |
| N | -2.118166000 | 0.192966000  | 0.656565000  |
| S | 1.598162000  | -0.879778000 | 0.042911000  |
| H | 1.277993000  | -1.045137000 | 1.329194000  |
| S | 0.844428000  | 1.013610000  | -0.213468000 |
| H | 1.758613000  | 1.730692000  | 0.445716000  |

***Conformer 5b***

|   |              |              |              |
|---|--------------|--------------|--------------|
| C | -2.477240000 | 0.381803000  | 0.539785000  |
| H | -2.591447000 | -0.274129000 | 1.393939000  |
| H | -1.784568000 | 1.182687000  | 0.768645000  |
| H | -3.436842000 | 0.785100000  | 0.240881000  |
| H | -2.522871000 | -1.181938000 | -0.850584000 |
| H | -1.767154000 | 0.171884000  | -1.412642000 |
| H | -0.984172000 | -0.800853000 | -0.325511000 |



|   |              |              |              |
|---|--------------|--------------|--------------|
| N | -1.911125000 | -0.410254000 | -0.587757000 |
| S | 1.205423000  | -1.007022000 | 0.081568000  |
| H | 1.476122000  | -1.108419000 | 1.386049000  |
| S | 1.139418000  | 1.043608000  | -0.062563000 |
| H | 2.334801000  | 1.221257000  | -0.629272000 |

***Conformer 5c***

|   |              |              |              |
|---|--------------|--------------|--------------|
| C | 2.415346000  | -0.260249000 | -0.663889000 |
| H | 2.497398000  | 0.646083000  | -1.251175000 |
| H | 3.377667000  | -0.750965000 | -0.586868000 |
| H | 1.678669000  | -0.926292000 | -1.096757000 |
| H | 1.017576000  | 0.570722000  | 0.638971000  |
| H | 1.847082000  | -0.713937000 | 1.294119000  |
| H | 2.594120000  | 0.748847000  | 1.162531000  |
| N | 1.947521000  | 0.109712000  | 0.701948000  |
| S | -1.310376000 | -0.978768000 | 0.117436000  |
| H | -2.142059000 | -1.183563000 | -0.906315000 |
| S | -1.013608000 | 1.035064000  | -0.178155000 |
| H | -1.811449000 | 1.501886000  | 0.786686000  |

**Optimized conformers for the H<sub>2</sub>S<sub>2</sub>.methylguanidinium complex**

***Conformer 6a***

|   |              |              |              |
|---|--------------|--------------|--------------|
| C | -1.949668000 | -0.280666000 | -0.129540000 |
| H | -1.220597000 | -1.513908000 | -1.560636000 |
| H | -0.126097000 | -0.269980000 | -1.076211000 |
| N | -1.050779000 | -0.685736000 | -1.016736000 |
| H | -3.008305000 | -2.027418000 | -0.114716000 |
| N | -2.993983000 | -1.061324000 | 0.158224000  |
| N | -1.834227000 | 0.902113000  | 0.451417000  |
| H | -3.792344000 | -0.701004000 | 0.649384000  |
| C | -0.851917000 | 1.907565000  | 0.079283000  |
| H | 0.114061000  | 1.694111000  | 0.529918000  |
| H | -0.762172000 | 1.947741000  | -1.002763000 |
| H | -1.205346000 | 2.870138000  | 0.430506000  |
| H | -2.428453000 | 1.086939000  | 1.242020000  |
| S | 2.194444000  | 0.212030000  | -0.812367000 |
| H | 2.867160000  | -0.808855000 | -1.351001000 |
| S | 1.845321000  | -0.591842000 | 1.045369000  |
| H | 2.888280000  | -0.047533000 | 1.676677000  |

**Conformer 6b**

|   |              |              |              |
|---|--------------|--------------|--------------|
| C | -1.540612000 | 0.305741000  | 0.135243000  |
| H | 0.028385000  | -0.971340000 | -0.149118000 |
| H | -1.502267000 | -1.527911000 | -0.740535000 |
| N | -0.961781000 | -0.806201000 | -0.298647000 |
| H | 0.208932000  | 1.318433000  | 0.421830000  |
| N | -0.784723000 | 1.293468000  | 0.613670000  |
| N | -2.861126000 | 0.420986000  | 0.111681000  |
| H | -1.207822000 | 2.116501000  | 1.004219000  |
| C | -3.756129000 | -0.652419000 | -0.284363000 |
| H | -3.659943000 | -0.876273000 | -1.345062000 |
| H | -3.563678000 | -1.543503000 | 0.308299000  |
| H | -4.772953000 | -0.331293000 | -0.093772000 |
| H | -3.256107000 | 1.320584000  | 0.324920000  |
| S | 2.390796000  | -1.061280000 | 0.343657000  |
| H | 2.110534000  | -0.686222000 | 1.596094000  |
| S | 2.364480000  | 0.791010000  | -0.547576000 |
| H | 3.564361000  | 1.227630000  | -0.156382000 |

**Conformer 6c**

|   |              |              |              |
|---|--------------|--------------|--------------|
| C | 1.741519000  | -0.520135000 | 0.145019000  |
| H | 3.493474000  | -1.565401000 | 0.174177000  |
| H | 3.667736000  | 0.137461000  | 0.015289000  |
| N | 3.064461000  | -0.661098000 | 0.093276000  |
| H | 1.383848000  | -2.457304000 | 0.664596000  |
| N | 0.973086000  | -1.570446000 | 0.433424000  |
| N | 1.192294000  | 0.658045000  | -0.087374000 |
| H | -0.020095000 | -1.544466000 | 0.242012000  |
| C | 1.947318000  | 1.832548000  | -0.483934000 |
| H | 2.593581000  | 2.181293000  | 0.320025000  |
| H | 2.534462000  | 1.625198000  | -1.375644000 |
| H | 1.240136000  | 2.619529000  | -0.718217000 |
| H | 0.201080000  | 0.766780000  | 0.106864000  |
| S | -2.140696000 | -0.757265000 | -0.663702000 |
| H | -3.371455000 | -1.206570000 | -0.405010000 |
| S | -2.143239000 | 0.900392000  | 0.551922000  |
| H | -1.921723000 | 0.293463000  | 1.722594000  |

**Conformer 6d**

|   |              |              |              |
|---|--------------|--------------|--------------|
| C | -1.748185000 | -0.548556000 | -0.115897000 |
| H | -3.449678000 | -1.670311000 | -0.212707000 |
| H | -3.705950000 | 0.023765000  | -0.076264000 |
| N | -3.065180000 | -0.747516000 | -0.119143000 |
| H | -1.280288000 | -2.474987000 | -0.582875000 |

|   |              |              |              |
|---|--------------|--------------|--------------|
| N | -0.922862000 | -1.568273000 | -0.341046000 |
| N | -1.263473000 | 0.658583000  | 0.115296000  |
| H | 0.069798000  | -1.479106000 | -0.158478000 |
| C | -2.090861000 | 1.807753000  | 0.432097000  |
| H | -2.710697000 | 2.098349000  | -0.414673000 |
| H | -2.712594000 | 1.603428000  | 1.300854000  |
| H | -1.434371000 | 2.635519000  | 0.672764000  |
| H | -0.269116000 | 0.804953000  | -0.027426000 |
| S | 2.279152000  | -0.780097000 | 0.571913000  |
| H | 3.251043000  | -1.353413000 | -0.142297000 |
| S | 2.052724000  | 0.911457000  | -0.575188000 |
| H | 2.726708000  | 1.755301000  | 0.210559000  |

### Optimized conformers for the H<sub>2</sub>S<sub>2</sub>.methanethiol complex

#### *Conformer 7a*

|   |              |              |              |
|---|--------------|--------------|--------------|
| C | -1.874313000 | 0.203287000  | 1.139647000  |
| H | -2.714934000 | -0.238357000 | 1.666691000  |
| H | -0.959591000 | -0.266385000 | 1.488493000  |
| H | -1.858873000 | 1.268931000  | 1.343409000  |
| S | -2.139254000 | -0.124217000 | -0.613150000 |
| H | -1.041718000 | 0.497924000  | -1.041264000 |
| S | 1.592946000  | 0.996648000  | -0.178597000 |
| H | 1.110683000  | 1.363947000  | 1.011208000  |
| S | 1.425792000  | -1.034373000 | 0.049910000  |
| H | 2.638572000  | -1.254701000 | 0.562975000  |

#### *Conformer 7b*

|   |              |              |              |
|---|--------------|--------------|--------------|
| C | -1.808556000 | -0.663227000 | 0.977228000  |
| H | -1.308540000 | -1.590621000 | 0.717938000  |
| H | -1.171380000 | -0.102871000 | 1.653905000  |
| H | -2.758912000 | -0.890442000 | 1.447486000  |
| S | -2.053503000 | 0.222548000  | -0.574678000 |
| H | -2.748925000 | 1.239351000  | -0.069382000 |
| S | 1.605261000  | -0.951744000 | -0.198847000 |
| H | 1.997138000  | -0.831052000 | -1.468743000 |
| S | 1.487497000  | 1.038193000  | 0.271742000  |
| H | 0.213885000  | 1.211029000  | -0.116037000 |

#### *Conformer 7c*

|   |             |              |             |
|---|-------------|--------------|-------------|
| C | 1.932642000 | -0.223273000 | 1.132201000 |
| H | 2.608415000 | 0.471429000  | 1.621920000 |

|   |              |              |              |
|---|--------------|--------------|--------------|
| H | 0.923623000  | -0.044358000 | 1.490611000  |
| H | 2.240474000  | -1.236947000 | 1.363411000  |
| S | 2.058196000  | 0.103036000  | -0.636876000 |
| H | 1.174527000  | -0.821392000 | -1.012440000 |
| S | -1.486779000 | 1.060976000  | 0.098837000  |
| H | -0.220331000 | 1.179520000  | -0.331825000 |
| S | -1.589549000 | -0.983523000 | -0.003657000 |
| H | -2.032454000 | -1.096448000 | -1.257753000 |

### Optimized conformers for the H<sub>2</sub>S<sub>2</sub>.methanethiolate complex

#### *Conformer 8a*

|   |              |              |              |
|---|--------------|--------------|--------------|
| C | -1.762728000 | 0.931465000  | 0.754394000  |
| H | -1.387990000 | 1.835809000  | 0.283445000  |
| H | -2.692834000 | 1.145144000  | 1.275913000  |
| H | -1.019207000 | 0.570697000  | 1.461914000  |
| S | -2.041518000 | -0.367379000 | -0.467663000 |
| H | -0.752516000 | -0.854850000 | -0.328355000 |
| S | 1.709950000  | 0.814637000  | -0.388298000 |
| H | 1.611891000  | 1.562905000  | 0.716885000  |
| S | 1.257632000  | -1.062789000 | 0.359951000  |

#### *Conformer 8b*

|   |              |              |              |
|---|--------------|--------------|--------------|
| C | 1.790019000  | 0.625854000  | 0.988739000  |
| H | 1.843951000  | 1.699195000  | 0.829323000  |
| H | 0.817816000  | 0.373610000  | 1.411384000  |
| H | 2.578158000  | 0.319829000  | 1.671890000  |
| S | 1.926990000  | -0.261655000 | -0.580853000 |
| H | 0.667104000  | -0.825318000 | -0.439116000 |
| S | -1.631062000 | 0.922877000  | -0.223577000 |
| H | -0.490417000 | 1.169481000  | -0.885254000 |
| S | -1.305724000 | -1.066967000 | 0.271889000  |

#### *Conformer 8c*

|   |              |              |              |
|---|--------------|--------------|--------------|
| C | 1.912220000  | 0.957814000  | 0.726834000  |
| H | 1.022813000  | 0.825221000  | 1.348869000  |
| H | 2.780681000  | 0.950061000  | 1.387155000  |
| H | 1.846027000  | 1.945645000  | 0.268803000  |
| S | 2.023112000  | -0.348872000 | -0.527692000 |
| S | -1.107944000 | -1.011736000 | 0.394969000  |
| H | 0.146633000  | -0.819982000 | -0.015910000 |

|   |              |             |              |
|---|--------------|-------------|--------------|
| S | -1.867423000 | 0.788206000 | -0.231303000 |
| H | -2.033393000 | 0.510607000 | -1.525500000 |

***Conformer 8d***

|   |              |              |              |
|---|--------------|--------------|--------------|
| C | -1.918918000 | 0.000420000  | 1.095538000  |
| H | -0.938954000 | 0.000114000  | 1.579219000  |
| H | -2.460036000 | 0.883094000  | 1.437374000  |
| H | -2.460859000 | -0.881539000 | 1.437914000  |
| S | -1.737614000 | -0.000223000 | -0.710026000 |
| S | 1.403336000  | 1.043805000  | 0.033955000  |
| H | 0.135531000  | 1.020619000  | -0.380400000 |
| S | 1.403184000  | -1.043844000 | 0.034357000  |
| H | 0.135352000  | -1.020601000 | -0.379911000 |

**Optimized conformers for the H<sub>2</sub>S<sub>2</sub>.dimethyl sulfide complex**

***Conformer 9a***

|   |              |              |              |
|---|--------------|--------------|--------------|
| C | 1.535349000  | -0.816476000 | 1.113168000  |
| H | 2.085624000  | -1.616116000 | 1.601818000  |
| H | 1.299506000  | -0.049647000 | 1.847505000  |
| H | 0.615694000  | -1.220948000 | 0.697567000  |
| S | 2.583726000  | -0.158969000 | -0.183846000 |
| C | 1.473150000  | 1.106063000  | -0.799627000 |
| H | 1.980383000  | 1.617686000  | -1.613321000 |
| H | 0.555729000  | 0.661407000  | -1.178324000 |
| H | 1.237906000  | 1.828567000  | -0.021181000 |
| S | -2.037567000 | -0.842762000 | -0.607321000 |
| H | -2.319820000 | -0.183644000 | -1.733211000 |
| S | -1.822416000 | 0.774885000  | 0.632576000  |
| H | -3.085901000 | 0.854707000  | 1.055363000  |

***Conformer 9b***

|   |              |              |              |
|---|--------------|--------------|--------------|
| C | 3.105553000  | -0.809442000 | -0.182585000 |
| H | 3.111282000  | -1.769991000 | -0.689652000 |
| H | 3.804854000  | -0.141754000 | -0.680111000 |
| H | 3.408527000  | -0.952687000 | 0.851844000  |
| S | 1.437382000  | -0.158704000 | -0.273437000 |
| C | 1.688895000  | 1.354113000  | 0.653582000  |
| H | 0.733735000  | 1.869886000  | 0.685568000  |
| H | 2.011087000  | 1.134165000  | 1.668567000  |
| H | 2.424937000  | 1.986289000  | 0.162282000  |
| S | -2.067417000 | -1.056837000 | 0.305112000  |
| H | -0.759856000 | -1.184948000 | 0.568578000  |
| S | -1.986989000 | 0.907681000  | -0.272265000 |

|   |              |             |              |
|---|--------------|-------------|--------------|
| H | -1.628873000 | 0.716769000 | -1.543614000 |
|---|--------------|-------------|--------------|

***Conformer 9c***

|   |              |              |              |
|---|--------------|--------------|--------------|
| C | 1.603848000  | -0.458868000 | 1.392248000  |
| H | 1.621785000  | -1.492974000 | 1.725264000  |
| H | 2.353342000  | 0.104768000  | 1.942622000  |
| H | 0.616300000  | -0.042102000 | 1.576608000  |
| S | 1.970976000  | -0.450715000 | -0.363301000 |
| C | 1.823754000  | 1.313688000  | -0.654046000 |
| H | 1.975839000  | 1.483821000  | -1.716390000 |
| H | 0.833152000  | 1.661190000  | -0.372250000 |
| H | 2.582265000  | 1.857638000  | -0.096159000 |
| S | -1.977405000 | 0.859312000  | 0.415398000  |
| H | -2.212777000 | 1.561206000  | -0.695433000 |
| S | -1.739004000 | -0.992162000 | -0.437454000 |
| H | -0.408593000 | -0.925438000 | -0.627756000 |

**Optimized conformers for the H<sub>2</sub>S<sub>2</sub>.dimethyl disulfide complex**

***Conformer 10a***

|   |              |              |              |
|---|--------------|--------------|--------------|
| S | 1.676723000  | 0.701516000  | -0.769081000 |
| S | 2.194434000  | -1.093634000 | 0.021563000  |
| C | 1.657066000  | 1.765226000  | 0.683357000  |
| H | 0.897616000  | 1.441606000  | 1.390653000  |
| H | 2.634113000  | 1.770779000  | 1.155764000  |
| H | 1.414956000  | 2.766765000  | 0.330451000  |
| C | 0.607425000  | -1.738195000 | 0.575035000  |
| H | -0.080213000 | -1.823842000 | -0.260985000 |
| H | 0.809404000  | -2.726396000 | 0.985435000  |
| H | 0.179255000  | -1.109284000 | 1.351022000  |
| S | -1.952425000 | 1.054025000  | 0.263418000  |
| H | -0.773519000 | 0.808271000  | -0.330853000 |
| S | -2.920663000 | -0.654510000 | -0.322994000 |
| H | -2.637664000 | -1.408425000 | 0.741664000  |

***Conformer 10b***

|   |              |              |              |
|---|--------------|--------------|--------------|
| S | -2.015256000 | -0.853590000 | -0.077295000 |
| S | -0.897021000 | 0.740782000  | -0.650358000 |
| C | -3.636877000 | -0.113465000 | 0.171237000  |
| H | -3.612080000 | 0.611813000  | 0.978920000  |
| H | -3.980014000 | 0.353346000  | -0.746345000 |
| H | -4.308200000 | -0.926140000 | 0.442437000  |

|   |              |              |              |
|---|--------------|--------------|--------------|
| C | -0.432489000 | 1.459007000  | 0.932816000  |
| H | 0.127793000  | 0.737108000  | 1.520542000  |
| H | 0.200550000  | 2.314932000  | 0.707946000  |
| H | -1.312757000 | 1.790454000  | 1.475787000  |
| S | 2.890062000  | 0.594261000  | -0.121016000 |
| H | 3.253168000  | 0.396904000  | -1.389906000 |
| S | 2.096765000  | -1.254842000 | 0.258241000  |
| H | 0.854954000  | -0.977445000 | -0.166844000 |

***Conformer 10c***

|   |              |              |              |
|---|--------------|--------------|--------------|
| S | -1.562769000 | -1.039043000 | -0.456006000 |
| S | -2.364107000 | 0.745820000  | 0.080445000  |
| C | -0.814101000 | -1.602781000 | 1.082719000  |
| H | -0.034268000 | -0.917860000 | 1.404102000  |
| H | -1.573316000 | -1.702493000 | 1.852013000  |
| H | -0.373815000 | -2.576359000 | 0.871457000  |
| C | -0.973349000 | 1.870243000  | -0.125995000 |
| H | -0.642711000 | 1.880963000  | -1.160006000 |
| H | -1.341394000 | 2.857837000  | 0.147613000  |
| H | -0.151843000 | 1.600054000  | 0.531382000  |
| S | 2.155654000  | -0.295848000 | -1.055377000 |
| H | 0.831293000  | -0.491529000 | -0.956103000 |
| S | 2.473980000  | 0.488458000  | 0.813138000  |
| H | 2.766620000  | -0.645578000 | 1.454014000  |

***Conformer 10d***

|   |              |              |              |
|---|--------------|--------------|--------------|
| S | -1.214741000 | -0.961689000 | 0.075811000  |
| S | -1.234857000 | 0.825391000  | -0.886671000 |
| C | -2.942637000 | -1.146513000 | 0.546532000  |
| H | -3.241646000 | -0.368560000 | 1.242522000  |
| H | -3.575404000 | -1.128691000 | -0.334949000 |
| H | -3.025082000 | -2.114821000 | 1.036887000  |
| C | -1.082864000 | 2.001851000  | 0.468191000  |
| H | -0.160558000 | 1.823110000  | 1.011370000  |
| H | -1.055542000 | 2.989984000  | 0.011879000  |
| H | -1.942079000 | 1.938941000  | 1.129467000  |
| S | 2.257261000  | 0.182208000  | 1.042071000  |
| H | 1.372761000  | -0.695136000 | 1.524140000  |
| S | 2.348200000  | -0.527862000 | -0.878437000 |
| H | 1.286758000  | 0.134378000  | -1.354053000 |

## Optimized conformers for the H<sub>2</sub>S<sub>2</sub>.methanol complex

### *Conformer 11a*

|   |              |              |              |
|---|--------------|--------------|--------------|
| C | 2.474815000  | 0.201492000  | -0.522942000 |
| H | 3.328659000  | 0.851238000  | -0.360822000 |
| H | 2.794091000  | -0.644302000 | -1.133202000 |
| H | 1.711871000  | 0.761644000  | -1.065918000 |
| O | 2.018924000  | -0.208311000 | 0.751244000  |
| H | 1.228345000  | -0.736685000 | 0.614793000  |
| S | -1.127822000 | 1.026039000  | 0.097427000  |
| H | -2.321286000 | 1.272969000  | -0.446760000 |
| S | -1.128168000 | -1.006054000 | -0.189141000 |
| H | -1.646121000 | -1.367085000 | 0.987035000  |

### *Conformer 11b*

|   |              |              |              |
|---|--------------|--------------|--------------|
| C | 2.384071000  | -0.614514000 | -0.422337000 |
| H | 1.465635000  | -1.188328000 | -0.481840000 |
| H | 2.599809000  | -0.191170000 | -1.402596000 |
| H | 3.196159000  | -1.277746000 | -0.127902000 |
| O | 2.161636000  | 0.398825000  | 0.549315000  |
| H | 2.959628000  | 0.922279000  | 0.632163000  |
| S | -1.062288000 | 1.066387000  | -0.177454000 |
| H | 0.232910000  | 1.028699000  | 0.163977000  |
| S | -1.455170000 | -0.933379000 | 0.052876000  |
| H | -1.772322000 | -0.925382000 | 1.348938000  |

### *Conformer 11c*

|   |              |              |              |
|---|--------------|--------------|--------------|
| C | -3.133842000 | 0.082719000  | 0.035923000  |
| H | -3.726763000 | -0.819533000 | 0.140281000  |
| H | -3.309568000 | 0.715869000  | 0.905598000  |
| H | -3.459508000 | 0.609965000  | -0.860552000 |
| O | -1.780836000 | -0.321154000 | -0.055895000 |
| H | -1.229397000 | 0.461112000  | -0.149027000 |
| S | 1.475006000  | -0.983862000 | 0.012528000  |
| H | 0.177714000  | -1.297772000 | 0.096192000  |
| S | 1.232682000  | 1.051626000  | -0.082858000 |
| H | 1.274246000  | 1.319061000  | 1.224415000  |

### *Conformer 11d*

|   |             |              |              |
|---|-------------|--------------|--------------|
| C | 2.460290000 | 0.017168000  | -0.526750000 |
| H | 3.166224000 | 0.840065000  | -0.490456000 |
| H | 2.992716000 | -0.888493000 | -0.815650000 |
| H | 1.701939000 | 0.239375000  | -1.279461000 |



|   |              |              |              |
|---|--------------|--------------|--------------|
| O | 1.893810000  | -0.097928000 | 0.767557000  |
| H | 1.233395000  | -0.795817000 | 0.725865000  |
| S | -1.203348000 | -0.980465000 | -0.146728000 |
| H | -1.733783000 | -1.235668000 | 1.051388000  |
| S | -1.132338000 | 1.066830000  | -0.020499000 |
| H | 0.098262000  | 1.139111000  | 0.503997000  |

### Optimized conformers for the H<sub>2</sub>S<sub>2</sub>.acetic acid complex

#### *Conformer 12a*

|   |              |              |              |
|---|--------------|--------------|--------------|
| C | 1.640707000  | -0.234871000 | 1.400316000  |
| H | 1.875737000  | 0.685212000  | 1.920185000  |
| H | 2.300281000  | -1.029770000 | 1.742514000  |
| H | 0.618134000  | -0.539078000 | 1.604481000  |
| C | 1.839847000  | -0.042453000 | -0.065591000 |
| O | 2.383402000  | 0.888760000  | -0.599678000 |
| O | 1.351506000  | -1.094545000 | -0.772819000 |
| H | 1.548836000  | -0.898134000 | -1.698378000 |
| S | -2.034625000 | -0.813653000 | 0.014983000  |
| H | -0.867521000 | -1.377479000 | -0.310646000 |
| S | -1.381380000 | 1.128945000  | 0.044673000  |
| H | -1.581977000 | 1.424805000  | -1.241027000 |

#### *Conformer 12b*

|   |              |              |              |
|---|--------------|--------------|--------------|
| C | 1.536971000  | 1.190217000  | 0.580308000  |
| H | 0.480500000  | 1.283146000  | 0.357088000  |
| H | 2.080557000  | 2.068318000  | 0.246396000  |
| H | 1.674277000  | 1.101834000  | 1.656237000  |
| C | 2.084272000  | -0.036364000 | -0.068002000 |
| O | 1.434444000  | -0.961278000 | -0.498934000 |
| O | 3.428586000  | -0.026921000 | -0.111343000 |
| H | 3.690588000  | -0.862260000 | -0.520447000 |
| S | -1.854700000 | -1.015775000 | 0.386937000  |
| H | -0.570299000 | -1.084829000 | 0.009452000  |
| S | -2.233119000 | 0.883828000  | -0.286934000 |
| H | -2.582225000 | 0.587412000  | -1.540397000 |

#### *Conformer 12c*

|   |              |              |              |
|---|--------------|--------------|--------------|
| C | -3.424549000 | -0.100291000 | -0.030234000 |
| H | -3.797622000 | -1.103163000 | 0.132990000  |
| H | -3.749782000 | 0.270206000  | -0.998713000 |
| H | -3.815171000 | 0.575226000  | 0.726133000  |
| C | -1.931675000 | -0.099531000 | 0.026013000  |
| O | -1.245815000 | -1.078727000 | 0.227365000  |

|   |              |              |              |
|---|--------------|--------------|--------------|
| O | -1.428788000 | 1.122261000  | -0.173185000 |
| H | -0.454723000 | 1.064974000  | -0.117913000 |
| S | 2.058009000  | -1.013279000 | -0.113927000 |
| H | 0.755936000  | -1.297155000 | 0.045142000  |
| S | 1.856656000  | 1.024495000  | 0.017810000  |
| H | 1.960896000  | 1.161113000  | 1.342120000  |

**Optimized conformers for the H<sub>2</sub>S<sub>2</sub>.acetate complex**

***Conformer 13a***

|   |              |              |              |
|---|--------------|--------------|--------------|
| C | 3.281686000  | -0.171639000 | -0.305167000 |
| H | 3.346212000  | -0.352861000 | -1.377080000 |
| H | 3.754899000  | -0.987671000 | 0.234568000  |
| H | 3.806688000  | 0.760711000  | -0.103002000 |
| C | 1.808300000  | -0.024236000 | 0.092948000  |
| O | 1.340078000  | -0.829799000 | 0.918139000  |
| O | 1.203646000  | 0.933200000  | -0.483435000 |
| S | -2.058477000 | -0.897756000 | -0.397766000 |
| H | -1.791925000 | -1.577851000 | 0.718467000  |
| S | -1.668150000 | 0.991701000  | 0.295991000  |
| H | -0.379545000 | 1.002597000  | -0.048874000 |

***Conformer 13b***

|   |              |              |              |
|---|--------------|--------------|--------------|
| C | -3.303734000 | -0.908411000 | -0.005631000 |
| H | -3.252425000 | -1.530386000 | -0.896187000 |
| H | -4.240718000 | -0.363008000 | 0.015453000  |
| H | -3.234446000 | -1.567704000 | 0.856399000  |
| C | -2.141282000 | 0.057536000  | 0.002397000  |
| O | -2.296734000 | 1.264380000  | 0.026006000  |
| O | -0.995528000 | -0.581324000 | -0.019426000 |
| H | -0.175616000 | 0.059636000  | -0.015527000 |
| S | 1.518099000  | 0.985618000  | -0.001346000 |
| S | 2.677990000  | -0.731133000 | -0.074801000 |
| H | 2.773969000  | -1.029500000 | 1.224977000  |

***Conformer 13c***

|   |             |              |              |
|---|-------------|--------------|--------------|
| C | 3.240258000 | -0.007044000 | 0.029072000  |
| H | 3.568790000 | -0.183952000 | 1.051467000  |
| H | 3.665163000 | 0.921245000  | -0.341296000 |
| H | 3.593296000 | -0.841614000 | -0.573924000 |
| C | 1.714947000 | 0.027634000  | -0.010743000 |
| O | 1.169896000 | 1.060677000  | -0.466110000 |
| O | 1.142140000 | -1.010483000 | 0.426650000  |

|   |              |              |              |
|---|--------------|--------------|--------------|
| S | -1.854189000 | 0.997655000  | 0.241096000  |
| H | -0.550618000 | 1.205650000  | -0.136861000 |
| S | -1.776291000 | -1.029486000 | -0.235634000 |
| H | -0.416463000 | -1.117132000 | 0.118928000  |

***Conformer 13d***

|   |              |              |              |
|---|--------------|--------------|--------------|
| C | -1.353510000 | -0.926049000 | 0.903847000  |
| H | -0.482769000 | -1.376847000 | 0.429325000  |
| H | -2.050269000 | -1.685407000 | 1.241443000  |
| H | -0.970802000 | -0.350620000 | 1.743580000  |
| C | -2.046741000 | -0.010447000 | -0.067132000 |
| O | -3.216949000 | -0.138060000 | -0.376556000 |
| O | -1.302852000 | 0.957332000  | -0.577809000 |
| H | -0.354299000 | 0.939944000  | -0.214806000 |
| S | 2.095953000  | -0.854547000 | -0.354706000 |
| H | 2.051953000  | -0.598938000 | -1.666207000 |
| S | 1.551929000  | 0.988088000  | 0.422287000  |

**Optimized conformers for the H<sub>2</sub>S<sub>2</sub>.toluene complex**

***Conformer 14a***

|   |              |              |              |
|---|--------------|--------------|--------------|
| C | -1.104454000 | 1.126354000  | -0.038099000 |
| C | -0.907028000 | 0.526200000  | 1.205691000  |
| C | -1.367619000 | -0.760428000 | 1.461564000  |
| C | -2.043437000 | -1.468192000 | 0.473801000  |
| C | -2.263809000 | -0.877453000 | -0.765656000 |
| C | -1.797175000 | 0.408820000  | -1.014337000 |
| H | -0.376244000 | 1.071611000  | 1.975704000  |
| H | -1.197724000 | -1.210034000 | 2.430854000  |
| H | -2.398705000 | -2.470790000 | 0.669428000  |
| H | -2.794847000 | -1.416621000 | -1.538661000 |
| H | -1.961050000 | 0.860994000  | -1.985079000 |
| C | -0.531925000 | 2.476132000  | -0.338202000 |
| H | -0.470880000 | 3.087520000  | 0.559621000  |
| H | 0.478870000  | 2.373601000  | -0.735208000 |
| H | -1.130328000 | 3.004700000  | -1.077354000 |
| S | 2.537706000  | 0.246390000  | 0.442008000  |
| H | 2.531336000  | -0.546712000 | 1.515876000  |
| S | 1.651684000  | -1.037063000 | -0.884686000 |
| H | 0.382006000  | -0.692094000 | -0.640918000 |

## Optimized conformers for the H<sub>2</sub>S<sub>2</sub>.3-methylindole complex

### *Conformer 15a*

|   |              |              |              |
|---|--------------|--------------|--------------|
| C | -1.120619000 | 0.703007000  | -0.205638000 |
| C | -1.400367000 | -0.027309000 | 0.977588000  |
| C | -2.450415000 | -0.938878000 | 1.061013000  |
| C | -3.225189000 | -1.118000000 | -0.071478000 |
| C | -2.962554000 | -0.411358000 | -1.258207000 |
| C | -1.921360000 | 0.494695000  | -1.337177000 |
| C | 0.027326000  | 1.510945000  | 0.048594000  |
| C | 0.394391000  | 1.256463000  | 1.349330000  |
| H | -2.651088000 | -1.489618000 | 1.970972000  |
| H | -4.047724000 | -1.819931000 | -0.043574000 |
| H | -3.588798000 | -0.582966000 | -2.123265000 |
| H | -1.723974000 | 1.031900000  | -2.256321000 |
| H | 1.217453000  | 1.658702000  | 1.917039000  |
| H | -0.397443000 | -0.020862000 | 2.839436000  |
| N | -0.461382000 | 0.338585000  | 1.903967000  |
| C | 0.719357000  | 2.396365000  | -0.924605000 |
| H | 1.098406000  | 1.820593000  | -1.770550000 |
| H | 0.044970000  | 3.156290000  | -1.318882000 |
| H | 1.565181000  | 2.899205000  | -0.460477000 |
| S | 1.671800000  | -1.512376000 | -0.648436000 |
| H | 0.739825000  | -0.571001000 | -0.436148000 |
| S | 3.285931000  | -0.416630000 | -0.022994000 |
| H | 3.285761000  | -0.783892000 | 1.260367000  |

### *Conformer 15b*

|   |              |              |              |
|---|--------------|--------------|--------------|
| C | 1.411689000  | 0.149771000  | -0.028705000 |
| C | 0.477711000  | 0.552505000  | 0.958502000  |
| C | -0.047167000 | 1.842603000  | 1.008550000  |
| C | 0.371682000  | 2.734851000  | 0.036414000  |
| C | 1.295359000  | 2.356969000  | -0.954320000 |
| C | 1.822425000  | 1.079542000  | -0.993037000 |
| C | 1.705812000  | -1.226828000 | 0.195164000  |
| C | 0.955896000  | -1.606881000 | 1.284922000  |
| H | -0.749905000 | 2.135906000  | 1.778077000  |
| H | -0.014504000 | 3.745504000  | 0.043118000  |
| H | 1.598251000  | 3.083463000  | -1.696220000 |
| H | 2.532940000  | 0.799383000  | -1.760566000 |
| H | 0.889134000  | -2.567383000 | 1.770074000  |
| H | -0.464659000 | -0.578399000 | 2.471549000  |
| N | 0.231424000  | -0.536216000 | 1.748169000  |
| C | 2.629173000  | -2.076799000 | -0.603597000 |
| H | 2.330240000  | -2.105048000 | -1.651636000 |

|   |              |              |              |
|---|--------------|--------------|--------------|
| H | 3.649046000  | -1.694444000 | -0.565669000 |
| H | 2.640271000  | -3.099032000 | -0.230688000 |
| S | -1.759373000 | -1.063026000 | -1.239785000 |
| H | -0.662032000 | -1.256957000 | -0.496571000 |
| S | -2.906922000 | -0.104258000 | 0.159821000  |
| H | -2.443518000 | 1.132662000  | -0.042577000 |

***Conformer 15c***

|   |              |              |              |
|---|--------------|--------------|--------------|
| C | 1.381654000  | 0.269602000  | 0.025547000  |
| C | 0.430472000  | 0.306724000  | 1.077632000  |
| C | -0.323779000 | 1.441715000  | 1.364830000  |
| C | -0.120924000 | 2.555678000  | 0.565884000  |
| C | 0.817737000  | 2.543953000  | -0.482529000 |
| C | 1.573977000  | 1.417028000  | -0.753947000 |
| C | 1.909356000  | -1.050801000 | -0.030591000 |
| C | 1.273009000  | -1.759125000 | 0.959761000  |
| H | -1.055210000 | 1.447453000  | 2.162155000  |
| H | -0.696232000 | 3.452747000  | 0.752333000  |
| H | 0.946476000  | 3.433966000  | -1.083881000 |
| H | 2.288179000  | 1.415924000  | -1.568027000 |
| H | 1.382556000  | -2.794154000 | 1.240900000  |
| H | -0.229714000 | -1.234097000 | 2.358627000  |
| N | 0.394267000  | -0.941947000 | 1.628073000  |
| C | 2.919907000  | -1.557832000 | -0.996842000 |
| H | 2.561085000  | -1.462946000 | -2.021869000 |
| H | 3.853596000  | -1.000745000 | -0.922411000 |
| H | 3.141258000  | -2.607900000 | -0.816305000 |
| S | -1.659226000 | -0.278815000 | -1.481005000 |
| H | -1.129101000 | 0.825715000  | -0.938500000 |
| S | -2.662888000 | -0.942260000 | 0.175310000  |
| H | -3.837393000 | -0.346786000 | -0.046896000 |

***Conformer 15d***

|   |              |              |              |
|---|--------------|--------------|--------------|
| C | 0.649086000  | 0.808733000  | 0.476853000  |
| C | 1.318163000  | 0.451979000  | -0.720829000 |
| C | 2.230221000  | -0.598397000 | -0.782498000 |
| C | 2.464761000  | -1.304432000 | 0.385115000  |
| C | 1.804336000  | -0.976347000 | 1.583458000  |
| C | 0.903281000  | 0.073403000  | 1.641434000  |
| C | -0.227478000 | 1.890963000  | 0.175073000  |
| C | -0.074649000 | 2.142339000  | -1.168808000 |
| H | 2.727846000  | -0.862610000 | -1.706755000 |
| H | 3.164770000  | -2.129145000 | 0.374583000  |
| H | 2.008328000  | -1.556214000 | 2.473659000  |
| H | 0.394356000  | 0.313848000  | 2.566350000  |

|   |              |              |              |
|---|--------------|--------------|--------------|
| H | -0.556846000 | 2.883001000  | -1.786506000 |
| H | 1.118792000  | 1.245287000  | -2.669071000 |
| N | 0.855533000  | 1.284524000  | -1.700867000 |
| C | -1.118921000 | 2.596747000  | 1.134208000  |
| H | -1.795400000 | 1.896506000  | 1.626491000  |
| H | -0.542607000 | 3.093894000  | 1.914376000  |
| H | -1.720670000 | 3.350834000  | 0.630054000  |
| S | -1.041683000 | -2.038229000 | -0.668022000 |
| H | -0.095116000 | -1.868821000 | 0.264393000  |
| S | -2.480763000 | -0.848657000 | 0.177953000  |
| H | -2.025859000 | 0.322007000  | -0.284442000 |

***Conformer 15e***

|   |              |              |              |
|---|--------------|--------------|--------------|
| C | 1.063867000  | 0.510565000  | -0.302076000 |
| C | 0.645663000  | 0.658303000  | 1.044461000  |
| C | -0.185556000 | 1.698166000  | 1.456312000  |
| C | -0.567816000 | 2.622573000  | 0.497440000  |
| C | -0.137055000 | 2.514320000  | -0.837459000 |
| C | 0.668481000  | 1.467712000  | -1.245777000 |
| C | 1.855452000  | -0.672180000 | -0.377873000 |
| C | 1.906746000  | -1.180712000 | 0.900210000  |
| H | -0.516003000 | 1.786387000  | 2.483290000  |
| H | -1.208119000 | 3.446414000  | 0.783537000  |
| H | -0.452433000 | 3.259735000  | -1.555101000 |
| H | 0.979122000  | 1.381228000  | -2.279309000 |
| H | 2.411013000  | -2.060300000 | 1.267416000  |
| H | 1.004691000  | -0.579890000 | 2.716602000  |
| N | 1.193346000  | -0.375289000 | 1.751565000  |
| C | 2.501678000  | -1.226625000 | -1.597934000 |
| H | 1.762091000  | -1.440055000 | -2.369684000 |
| H | 3.219172000  | -0.521951000 | -2.018175000 |
| H | 3.031077000  | -2.150945000 | -1.375069000 |
| S | -1.605241000 | -1.874532000 | 0.439494000  |
| H | -0.332330000 | -1.877470000 | 0.020388000  |
| S | -2.322941000 | -0.474608000 | -0.873277000 |
| H | -1.909540000 | 0.617362000  | -0.218128000 |

**Optimized conformers for the H<sub>2</sub>S<sub>2</sub>-4-methylphenol complex**

***Conformer 16a***

|   |              |              |              |
|---|--------------|--------------|--------------|
| C | -1.381359000 | -0.100274000 | 1.244923000  |
| C | -2.104043000 | -0.417445000 | 0.100648000  |
| C | -1.876975000 | 0.283651000  | -1.075926000 |
| C | -0.925775000 | 1.294403000  | -1.099011000 |

|   |              |              |              |
|---|--------------|--------------|--------------|
| C | -0.186114000 | 1.629285000  | 0.033631000  |
| C | -0.432042000 | 0.913156000  | 1.203314000  |
| H | -1.546393000 | -0.653420000 | 2.162267000  |
| H | -2.440519000 | 0.022184000  | -1.960832000 |
| H | -0.752553000 | 1.831877000  | -2.023815000 |
| H | 0.135521000  | 1.141899000  | 2.096985000  |
| O | -3.032726000 | -1.416442000 | 0.068865000  |
| H | -3.082985000 | -1.819714000 | 0.938718000  |
| C | 0.814176000  | 2.744467000  | 0.010894000  |
| H | 1.637234000  | 2.544431000  | 0.694759000  |
| H | 1.224534000  | 2.886852000  | -0.987811000 |
| H | 0.354924000  | 3.686067000  | 0.312546000  |
| S | 2.720747000  | -0.496953000 | 0.162631000  |
| H | 2.536259000  | 0.457783000  | -0.752103000 |
| S | 1.093001000  | -1.649256000 | -0.314400000 |
| H | 1.728612000  | -2.510534000 | -1.114160000 |

***Conformer 16b***

|   |              |              |              |
|---|--------------|--------------|--------------|
| C | 1.297986000  | -0.336916000 | 1.289914000  |
| C | 2.116204000  | -0.583851000 | 0.194850000  |
| C | 2.048021000  | 0.245063000  | -0.918813000 |
| C | 1.146392000  | 1.301984000  | -0.938170000 |
| C | 0.299731000  | 1.554860000  | 0.138219000  |
| C | 0.403321000  | 0.723214000  | 1.253338000  |
| H | 1.376098000  | -0.977439000 | 2.157884000  |
| H | 2.695157000  | 0.065289000  | -1.769521000 |
| H | 1.093939000  | 1.934842000  | -1.815837000 |
| H | -0.233583000 | 0.906759000  | 2.109619000  |
| O | 2.971884000  | -1.643195000 | 0.276714000  |
| H | 3.478548000  | -1.695311000 | -0.537031000 |
| C | -0.729082000 | 2.640274000  | 0.078796000  |
| H | -1.678842000 | 2.240658000  | -0.280415000 |
| H | -0.905401000 | 3.072636000  | 1.061763000  |
| H | -0.425109000 | 3.437146000  | -0.596989000 |
| S | -2.664730000 | -0.732667000 | 0.520355000  |
| H | -2.000984000 | -1.528412000 | 1.362272000  |
| S | -1.375619000 | -0.875469000 | -1.068967000 |
| H | -2.024749000 | -1.848194000 | -1.716464000 |

***Conformer 16c***

|   |              |              |              |
|---|--------------|--------------|--------------|
| C | -1.286160000 | -0.303854000 | 1.297385000  |
| C | -2.090275000 | -0.655524000 | 0.218957000  |
| C | -2.078857000 | 0.123436000  | -0.932404000 |
| C | -1.251047000 | 1.239490000  | -1.002144000 |
| C | -0.423743000 | 1.600383000  | 0.060090000  |

|   |              |              |              |
|---|--------------|--------------|--------------|
| C | -0.468684000 | 0.813261000  | 1.212141000  |
| H | -1.313653000 | -0.913052000 | 2.190463000  |
| H | -2.710873000 | -0.138724000 | -1.772747000 |
| H | -1.242046000 | 1.833144000  | -1.908138000 |
| H | 0.158093000  | 1.074615000  | 2.055329000  |
| O | -2.869166000 | -1.764301000 | 0.355321000  |
| H | -3.365724000 | -1.899691000 | -0.455234000 |
| C | 0.525630000  | 2.752848000  | -0.046147000 |
| H | 0.565624000  | 3.316699000  | 0.883957000  |
| H | 1.534018000  | 2.393921000  | -0.255986000 |
| H | 0.236096000  | 3.431367000  | -0.845639000 |
| S | 1.588139000  | -1.160698000 | -1.047831000 |
| H | 0.552782000  | -0.328559000 | -0.878149000 |
| S | 2.710597000  | -0.512107000 | 0.536606000  |
| H | 2.198040000  | -1.310671000 | 1.475903000  |

***Conformer 16d***

|   |              |              |              |
|---|--------------|--------------|--------------|
| C | 0.824130000  | 1.222245000  | -1.179611000 |
| C | 0.132151000  | 1.594914000  | -0.033931000 |
| C | 0.449013000  | 1.008028000  | 1.185993000  |
| C | 1.457752000  | 0.052577000  | 1.250067000  |
| C | 2.166174000  | -0.336752000 | 0.113965000  |
| C | 1.829160000  | 0.268932000  | -1.096538000 |
| H | 0.559024000  | 1.676597000  | -2.124351000 |
| H | -0.098454000 | 1.283444000  | 2.079154000  |
| H | 1.688060000  | -0.404890000 | 2.204625000  |
| H | 2.354842000  | -0.020049000 | -1.998508000 |
| O | -0.853503000 | 2.525765000  | -0.169513000 |
| H | -1.298288000 | 2.626732000  | 0.676132000  |
| C | 3.266319000  | -1.350706000 | 0.194981000  |
| H | 3.328249000  | -1.937115000 | -0.719540000 |
| H | 4.230942000  | -0.864978000 | 0.341630000  |
| H | 3.110577000  | -2.034550000 | 1.026798000  |
| S | -1.334609000 | -1.747431000 | -0.418238000 |
| H | -0.240701000 | -1.146688000 | 0.067332000  |
| S | -2.720204000 | -0.415079000 | 0.287824000  |
| H | -2.677417000 | 0.460113000  | -0.720095000 |

***Conformer 16e***

|   |             |              |              |
|---|-------------|--------------|--------------|
| C | 0.371504000 | 0.884049000  | 1.212509000  |
| C | 0.175631000 | 1.568087000  | 0.019319000  |
| C | 0.971126000 | 1.283924000  | -1.082883000 |
| C | 1.948021000 | 0.299462000  | -0.992817000 |
| C | 2.147413000 | -0.420080000 | 0.183197000  |
| C | 1.344480000 | -0.103254000 | 1.281089000  |



|   |              |              |              |
|---|--------------|--------------|--------------|
| H | -0.255081000 | 1.113950000  | 2.062448000  |
| H | 0.813160000  | 1.810344000  | -2.016789000 |
| H | 2.555018000  | 0.078453000  | -1.862201000 |
| H | 1.476501000  | -0.645919000 | 2.209436000  |
| O | -0.839537000 | 2.481252000  | -0.018348000 |
| H | -0.864558000 | 2.882198000  | -0.891097000 |
| C | 3.205911000  | -1.475927000 | 0.282984000  |
| H | 4.100749000  | -1.083457000 | 0.765655000  |
| H | 2.860174000  | -2.324110000 | 0.870882000  |
| H | 3.492300000  | -1.839878000 | -0.701314000 |
| S | -1.441468000 | -1.345651000 | -0.918624000 |
| H | -0.272566000 | -1.201785000 | -0.279792000 |
| S | -2.661062000 | -0.625259000 | 0.561135000  |
| H | -2.533441000 | 0.677183000  | 0.288973000  |

### Optimized conformers for the H<sub>2</sub>S<sub>2</sub>.4-methylimidazole complex

#### *Conformer 17a*

|   |              |              |              |
|---|--------------|--------------|--------------|
| C | -2.242608000 | -1.006111000 | -0.291223000 |
| C | -1.236232000 | 0.867069000  | -0.014011000 |
| C | -1.084273000 | 0.166559000  | 1.161947000  |
| N | -1.734936000 | -1.019145000 | 0.967282000  |
| H | -1.797323000 | -1.776372000 | 1.624914000  |
| H | -2.806334000 | -1.827807000 | -0.698085000 |
| H | -0.576351000 | 0.403592000  | 2.079417000  |
| N | -1.962460000 | 0.125428000  | -0.907407000 |
| C | -0.698741000 | 2.203927000  | -0.369756000 |
| H | -0.169856000 | 2.647299000  | 0.471037000  |
| H | -0.008464000 | 2.119455000  | -1.208750000 |
| H | -1.501330000 | 2.874840000  | -0.669693000 |
| S | 2.466091000  | 0.178534000  | 0.529123000  |
| H | 2.654608000  | 1.252559000  | -0.240845000 |
| S | 1.249003000  | -0.881675000 | -0.738632000 |
| H | 2.216448000  | -1.575969000 | -1.346714000 |

#### *Conformer 17b*

|   |              |              |              |
|---|--------------|--------------|--------------|
| C | -2.121656000 | -1.171758000 | -0.259656000 |
| C | -1.321434000 | 0.817584000  | -0.107055000 |
| C | -1.252826000 | 0.270957000  | 1.154606000  |
| N | -1.765559000 | -0.990706000 | 1.037027000  |
| H | -1.858866000 | -1.665379000 | 1.776393000  |
| H | -2.553735000 | -2.088448000 | -0.621904000 |
| H | -0.890028000 | 0.662737000  | 2.087719000  |
| N | -1.865529000 | -0.094798000 | -0.977918000 |

|   |              |              |              |
|---|--------------|--------------|--------------|
| C | -0.865851000 | 2.153867000  | -0.565163000 |
| H | -0.514174000 | 2.752102000  | 0.271831000  |
| H | -0.047857000 | 2.053900000  | -1.277976000 |
| H | -1.675751000 | 2.684162000  | -1.061617000 |
| S | 2.337066000  | 0.391199000  | 0.594313000  |
| H | 2.091361000  | -0.351044000 | 1.675999000  |
| S | 1.653552000  | -0.915630000 | -0.827092000 |
| H | 0.387390000  | -0.482521000 | -0.876116000 |

***Conformer 17c***

|   |              |              |              |
|---|--------------|--------------|--------------|
| C | -0.654076000 | -1.371245000 | -0.722238000 |
| C | -2.011233000 | 0.151533000  | -0.043003000 |
| C | -1.628735000 | -0.557797000 | 1.072145000  |
| N | -0.770711000 | -1.520634000 | 0.618947000  |
| H | -0.284483000 | -2.196916000 | 1.181932000  |
| H | -0.025261000 | -2.002585000 | -1.325051000 |
| H | -1.881595000 | -0.455731000 | 2.112222000  |
| N | -1.393241000 | -0.364603000 | -1.154728000 |
| C | -2.927648000 | 1.316592000  | -0.134936000 |
| H | -3.310561000 | 1.588620000  | 0.845955000  |
| H | -2.412311000 | 2.179177000  | -0.553749000 |
| H | -3.770883000 | 1.090862000  | -0.784519000 |
| S | 1.461290000  | 1.276294000  | 0.210110000  |
| H | 0.417054000  | 0.815747000  | -0.492366000 |
| S | 2.690941000  | -0.344339000 | -0.029791000 |
| H | 3.310168000  | 0.031696000  | -1.150887000 |

***Conformer 17d***

|   |              |              |              |
|---|--------------|--------------|--------------|
| C | -1.504135000 | -1.499767000 | 0.571704000  |
| C | -1.730249000 | 0.494292000  | -0.191027000 |
| C | -1.060552000 | -0.220700000 | -1.160210000 |
| N | -0.931242000 | -1.484535000 | -0.657853000 |
| H | -0.455226000 | -2.251214000 | -1.101122000 |
| H | -1.528653000 | -2.379910000 | 1.190460000  |
| H | -0.673497000 | 0.057725000  | -2.123601000 |
| N | -2.000237000 | -0.317814000 | 0.882279000  |
| C | -2.135097000 | 1.923184000  | -0.207345000 |
| H | -1.821057000 | 2.405491000  | -1.130282000 |
| H | -3.215655000 | 2.015990000  | -0.118967000 |
| H | -1.689498000 | 2.457440000  | 0.630067000  |
| S | 1.613388000  | 0.257129000  | 1.147886000  |
| H | 0.350108000  | 0.420686000  | 0.730250000  |
| S | 2.472783000  | 0.018590000  | -0.695951000 |
| H | 2.755288000  | 1.296676000  | -0.957476000 |

***Conformer 17e***

|   |              |              |              |
|---|--------------|--------------|--------------|
| C | 0.851608000  | -1.199158000 | -0.116353000 |
| C | 2.159654000  | 0.502730000  | 0.067137000  |
| C | 2.968171000  | -0.605367000 | -0.026876000 |
| N | 2.119887000  | -1.672871000 | -0.142459000 |
| H | 2.387604000  | -2.637521000 | -0.230812000 |
| H | -0.020081000 | -1.826357000 | -0.186844000 |
| H | 4.037462000  | -0.717712000 | -0.021044000 |
| N | 0.845981000  | 0.115204000  | 0.009882000  |
| C | 2.543502000  | 1.930284000  | 0.207641000  |
| H | 3.624685000  | 2.040530000  | 0.244375000  |
| H | 2.167754000  | 2.513011000  | -0.631155000 |
| H | 2.123739000  | 2.351914000  | 1.118738000  |
| S | -2.296207000 | 1.130047000  | -0.249324000 |
| H | -0.962772000 | 0.928459000  | -0.149548000 |
| S | -2.849076000 | -0.805057000 | 0.156174000  |
| H | -2.932553000 | -0.719432000 | 1.485435000  |

***Conformer 17f***

|   |              |              |              |
|---|--------------|--------------|--------------|
| C | 1.273445000  | -1.000622000 | 1.147453000  |
| C | 1.414340000  | 0.733422000  | -0.116788000 |
| C | 1.960647000  | -0.312985000 | -0.822903000 |
| N | 1.867910000  | -1.400783000 | -0.001729000 |
| H | 2.159899000  | -2.336806000 | -0.221670000 |
| H | 1.078985000  | -1.668571000 | 1.968528000  |
| H | 2.390188000  | -0.369219000 | -1.807012000 |
| N | 0.997805000  | 0.290553000  | 1.112867000  |
| C | 1.240914000  | 2.147520000  | -0.534329000 |
| H | 1.677805000  | 2.318466000  | -1.515549000 |
| H | 0.183424000  | 2.403976000  | -0.580096000 |
| H | 1.717045000  | 2.818358000  | 0.177890000  |
| S | -2.180477000 | 0.647301000  | 0.484242000  |
| H | -0.993488000 | 0.707208000  | 1.118976000  |
| S | -1.662347000 | -0.872908000 | -0.789978000 |
| H | -2.124751000 | -1.896093000 | -0.067855000 |

**Optimized conformers for the H<sub>2</sub>S<sub>2</sub>.4-methylimidazolium complex**

***Conformer 18a***

|   |              |              |              |
|---|--------------|--------------|--------------|
| C | -0.909820000 | -1.286605000 | -0.248217000 |
| C | -2.092399000 | 0.564409000  | 0.109807000  |
| C | -2.958961000 | -0.491323000 | 0.003747000  |
| N | -2.201784000 | -1.609748000 | -0.215584000 |

|   |              |              |              |
|---|--------------|--------------|--------------|
| H | -2.556912000 | -2.546582000 | -0.337245000 |
| H | -0.078303000 | -1.950551000 | -0.402956000 |
| H | -4.031177000 | -0.524149000 | 0.066509000  |
| C | -2.326206000 | 2.008306000  | 0.340096000  |
| H | -1.946491000 | 2.598193000  | -0.491266000 |
| H | -3.390317000 | 2.199382000  | 0.436029000  |
| H | -1.835633000 | 2.339237000  | 1.252763000  |
| H | 0.042675000  | 0.549508000  | -0.046969000 |
| N | -0.839465000 | 0.028039000  | -0.049606000 |
| S | 2.754639000  | -0.818142000 | 0.376217000  |
| H | 2.061474000  | -0.701512000 | 1.512786000  |
| S | 2.230394000  | 0.976959000  | -0.477516000 |
| H | 2.987211000  | 1.798647000  | 0.254877000  |

***Conformer 18b***

|   |              |              |              |
|---|--------------|--------------|--------------|
| C | -1.936553000 | -1.404557000 | -0.194259000 |
| C | -1.558367000 | 0.754022000  | 0.178959000  |
| C | -2.891919000 | 0.586848000  | -0.086495000 |
| N | -3.090075000 | -0.747964000 | -0.311132000 |
| H | -3.973113000 | -1.183166000 | -0.533178000 |
| H | -1.787668000 | -2.461818000 | -0.316522000 |
| H | -3.691390000 | 1.303454000  | -0.130192000 |
| C | -0.763303000 | 1.964386000  | 0.486934000  |
| H | -0.017410000 | 2.141344000  | -0.285014000 |
| H | -1.415377000 | 2.830733000  | 0.539273000  |
| H | -0.254047000 | 1.861178000  | 1.442752000  |
| H | -0.013718000 | -0.721392000 | 0.253811000  |
| N | -1.007027000 | -0.500393000 | 0.102338000  |
| S | 2.204723000  | -1.104800000 | 0.350472000  |
| H | 2.586120000  | -0.834377000 | 1.602203000  |
| S | 2.568796000  | 0.727065000  | -0.501455000 |
| H | 3.770871000  | 0.442113000  | -1.006676000 |

***Conformer 18c***

|   |              |              |              |
|---|--------------|--------------|--------------|
| C | -1.861924000 | -1.440715000 | 0.054908000  |
| C | -1.502368000 | 0.741320000  | -0.181435000 |
| C | -2.797873000 | 0.556591000  | 0.224216000  |
| N | -2.985380000 | -0.791866000 | 0.359513000  |
| H | -3.842304000 | -1.241357000 | 0.646048000  |
| H | -1.714100000 | -2.504907000 | 0.072941000  |
| H | -3.577829000 | 1.269209000  | 0.420214000  |
| C | -0.730239000 | 1.965709000  | -0.491742000 |
| H | -0.435416000 | 1.980450000  | -1.539096000 |
| H | -1.335132000 | 2.845166000  | -0.294352000 |
| H | 0.166722000  | 2.014008000  | 0.122808000  |

|   |              |              |              |
|---|--------------|--------------|--------------|
| H | 0.009136000  | -0.707064000 | -0.547239000 |
| N | -0.962606000 | -0.517115000 | -0.273086000 |
| S | 2.232490000  | -0.441845000 | -0.896898000 |
| H | 2.805096000  | -1.644210000 | -0.787451000 |
| S | 2.357411000  | 0.150781000  | 1.066324000  |
| H | 3.475737000  | 0.871169000  | 0.954645000  |

***Conformer 18d***

|   |              |              |              |
|---|--------------|--------------|--------------|
| C | -0.815004000 | 0.947184000  | -0.275742000 |
| C | -2.742988000 | -0.126078000 | 0.045267000  |
| C | -1.712786000 | -1.022132000 | 0.156685000  |
| N | -0.549246000 | -0.333967000 | -0.044668000 |
| H | 0.399522000  | -0.724831000 | -0.031760000 |
| H | -0.091874000 | 1.719118000  | -0.467130000 |
| H | -1.729555000 | -2.077262000 | 0.359422000  |
| C | -4.209509000 | -0.291139000 | 0.164310000  |
| H | -4.708837000 | -0.011353000 | -0.760799000 |
| H | -4.445326000 | -1.328978000 | 0.376804000  |
| H | -4.605551000 | 0.320102000  | 0.972383000  |
| H | -2.629319000 | 1.953394000  | -0.361514000 |
| N | -2.142216000 | 1.079972000  | -0.222454000 |
| S | 2.637047000  | -1.043092000 | -0.251791000 |
| H | 3.144910000  | -1.588707000 | 0.856744000  |
| S | 2.770124000  | 0.932940000  | 0.300022000  |
| H | 3.873266000  | 1.231904000  | -0.389121000 |

**Optimized conformers for the H<sub>2</sub>S<sub>2</sub>.4-methylphenolate complex**

***Conformer 19a***

|   |              |              |              |
|---|--------------|--------------|--------------|
| C | 0.889521000  | 1.244717000  | -1.117718000 |
| C | -0.006752000 | 1.452125000  | -0.030401000 |
| C | 0.375684000  | 0.797765000  | 1.176846000  |
| C | 1.475712000  | -0.049255000 | 1.250012000  |
| C | 2.302733000  | -0.279635000 | 0.148799000  |
| C | 1.988693000  | 0.404457000  | -1.029773000 |
| H | 0.645347000  | 1.727388000  | -2.057470000 |
| H | -0.259443000 | 0.940126000  | 2.043424000  |
| H | 1.694229000  | -0.551157000 | 2.189211000  |
| H | 2.615220000  | 0.259634000  | -1.906285000 |
| O | -1.102607000 | 2.116922000  | -0.143277000 |
| C | 3.508558000  | -1.166865000 | 0.242705000  |
| H | 3.691585000  | -1.688027000 | -0.697842000 |
| H | 4.413953000  | -0.602550000 | 0.481644000  |
| H | 3.381743000  | -1.920778000 | 1.020210000  |
| S | -2.741217000 | -0.333823000 | 0.470834000  |

|   |              |              |              |
|---|--------------|--------------|--------------|
| H | -2.193609000 | 0.842884000  | 0.162548000  |
| S | -1.508912000 | -1.484265000 | -0.713464000 |
| H | -0.371001000 | -1.273355000 | -0.049966000 |

***Conformer 19b***

|   |              |              |              |
|---|--------------|--------------|--------------|
| C | 1.820977000  | 1.619489000  | 0.292708000  |
| C | 0.552477000  | 1.057237000  | 0.126524000  |
| C | 0.456547000  | -0.315870000 | -0.130122000 |
| C | 1.610195000  | -1.083080000 | -0.223945000 |
| C | 2.882534000  | -0.533508000 | -0.066008000 |
| C | 2.961966000  | 0.832483000  | 0.198127000  |
| H | 1.891208000  | 2.679789000  | 0.498914000  |
| H | -0.524743000 | -0.763169000 | -0.231113000 |
| H | 1.512342000  | -2.146191000 | -0.417389000 |
| H | 3.935573000  | 1.291800000  | 0.334492000  |
| O | -0.517541000 | 1.853086000  | 0.239048000  |
| C | 4.115640000  | -1.375628000 | -0.208569000 |
| H | 4.392396000  | -1.503043000 | -1.256614000 |
| H | 4.963986000  | -0.920502000 | 0.301667000  |
| H | 3.965454000  | -2.369830000 | 0.211413000  |
| H | -1.354660000 | 1.357375000  | -0.031448000 |
| S | -3.079006000 | 0.471114000  | -0.649552000 |
| S | -3.040214000 | -1.275258000 | 0.464425000  |
| H | -3.135726000 | -0.791344000 | 1.707446000  |

***Conformer 19c***

|   |              |              |              |
|---|--------------|--------------|--------------|
| C | 0.988539000  | 1.192979000  | 0.581945000  |
| C | 0.300644000  | -0.003430000 | 0.914850000  |
| C | 0.995183000  | -1.196988000 | 0.585449000  |
| C | 2.254633000  | -1.189153000 | 0.001119000  |
| C | 2.914210000  | 0.002006000  | -0.305444000 |
| C | 2.247989000  | 1.190370000  | -0.002429000 |
| H | 0.492521000  | 2.132396000  | 0.800503000  |
| H | 0.504328000  | -2.138446000 | 0.806895000  |
| H | 2.736808000  | -2.135261000 | -0.229401000 |
| H | 2.724878000  | 2.138458000  | -0.235772000 |
| O | -0.874402000 | -0.006042000 | 1.460426000  |
| C | 4.294446000  | 0.004998000  | -0.893041000 |
| H | 4.456350000  | 0.885468000  | -1.515585000 |
| H | 5.066621000  | 0.007740000  | -0.119707000 |
| H | 4.460932000  | -0.875798000 | -1.513918000 |
| S | -2.922060000 | 1.050129000  | -0.488317000 |
| H | -1.975232000 | 1.008285000  | 0.450471000  |
| S | -2.919981000 | -1.047728000 | -0.502812000 |
| H | -1.973203000 | -1.017609000 | 0.436475000  |

## FF for H<sub>2</sub>S<sub>2</sub> and parameters for its interactions with amino acid side chains

Copy the following lines into a "name.str" file and stream it after reading the main FF topology and parameter files

\* Topology and parameter for hydrogen persulfide (H<sub>2</sub>S<sub>2</sub>)

\* January 2019

\*

set nat ?NATC

set app

if "@NAT" ne "?NATC" if @nat ne 0 set app append

read rtf card @app

\* Topology for water and ions

\*

31 1

MASS 1 HPER 1.00800 H ! H of H<sub>2</sub>S<sub>2</sub>

MASS 2 SPER 32.06000 S ! S of H<sub>2</sub>S<sub>2</sub>

DEFA FIRS NONE LAST NONE

AUTOGENERATE ANGLES DIHEDRALS

RESI H<sub>2</sub>S<sub>2</sub> 0.000 ! Hydrogen persulfide

! HP1

! \ SP1--SP2

! \ HP2

GROUP

ATOM HP1 HPER 0.155

ATOM SP1 SPER -0.155

ATOM SP2 SPER -0.155

ATOM HP2 HPER 0.155

BOND HP1 SP1 SP1 SP2 SP2 HP2

DONOR HP1 SP1

DONOR HP2 SP2

ACCEPTOR SP1

ACCEPTOR SP2

IC HP1 SP1 SP2 HP2 1.342 98.1 90.7 98.1 1.342

PATCH FIRST NONE LAST NONE

end

read para card flex @app

\* Parameters for water and ions

\*

ATOMS

MASS 1 HPER 1.00800 H ! H of H<sub>2</sub>S<sub>2</sub>

MASS 2 SPER 32.06000 S ! S of H<sub>2</sub>S<sub>2</sub>

BONDS

!atom type Kb b0

```

=====
HPER SPER 271.0 1.342
SPER SPER 189.5 2.059

```

ANGLES

```

!atom types          Ktheta Theta
=====
HPER SPER SPER      55.5 98.1

```

DIHEDRALS

```

!atom types          Kchi n delta
=====
HPER SPER SPER HPER 3.17 2 0.0

```

!!!Warning

! The following values are for gas-phase calculations only  
! Reset to defaults values when running MD simulations

NONBONDED nbxmod 5 atom cdiel fshift vatom vdistance vswitch -  
cutnb 2000.0 ctofnb 1950.0 ctonnb 1900.0 eps 1.0 e14fac 1.0 wmin 1.5

```

HPER 0.0 -0.1140 0.8980
SPER 0.0 -0.4115 2.0590

```

NBFIK

```

SPER OB -1.35820 3.47886 ! H2S2-acetic, acetamide and NMA
SPER OH1 -0.67513 3.50662 ! H2S2-acetic, MeOH and mephenol
SPER O -1.35820 3.47886 ! H2S2-acetamide
SPER NH2 -1.34643 3.34590 ! H2S2-acetamide, Methylamine, Methylammonium, and Methylimidazolium
SPER S -1.15820 3.82945 ! H2S2-DMS, CH3SH
SPER NC2 -0.97580 3.64273 ! H2S2-methylguanidium
SPER OC -2.76320 3.23160 ! H2S2-acetate
HPER OC -0.0 0.0 ! H2S2-acetate
SPER SS -5.98200 3.41132 ! H2S2-methanethiolate
HPER SS -0.0 0.0 ! H2S2-methanethiolate

```

END  
return
